# 1 **Redefining De Novo Gammaherpesvirus Infection Through High-Dimensional, Single-** 2 **Cell Analysis of Virus and Host**

3

4 Jennifer N. Berger<sup>1</sup>, Bridget Sanford<sup>2</sup>, Abigail K. Kimball<sup>3</sup>, Lauren M. Oko<sup>1</sup>, Rachael E.  
5 Kaspar<sup>3</sup>, Brian F. Niemeyer<sup>1</sup>, Kenneth L. Jones<sup>4</sup>, Eric T. Clambey<sup>3\*</sup>, Linda F. van Dyk<sup>1,5\*</sup>

6

## 7 **Affiliations**

8 <sup>1</sup> Department of Immunology and Microbiology, University of Colorado Anschutz Medical  
9 Campus | Aurora, CO, 80045, USA

10 <sup>2</sup> Department of Pediatric Oncology, University of Colorado Anschutz Medical Campus |  
11 Aurora, CO, 80045, USA

12 <sup>3</sup> Department of Anesthesiology, University of Colorado Anschutz Medical Campus | Aurora,  
13 CO, 80045, USA

14 <sup>4</sup> Department of Cell Biology, University of Oklahoma Health Sciences Center | Oklahoma City,  
15 OK, 73104, USA

16 <sup>5</sup> Lead Contact

17 \* Co-corresponding authors. Address correspondence and reprint requests to Dr. Eric  
18 Clambey ([Eric.Clambey@cuanschutz.edu](mailto:Eric.Clambey@cuanschutz.edu)) and Dr. Linda van Dyk  
19 ([Linda.VanDyk@cuanschutz.edu](mailto:Linda.VanDyk@cuanschutz.edu))

20

21 **Running title:** Single-cell analysis of de novo gammaherpesvirus infection

22

23 **ORCID:**

24 <https://orcid.org/0000-0002-7546-2758> (J.N.B.); 0000-0002-2173-0198 (B.S.); 0000-0002-  
25 9831-386X (A.K.K.); 0000-0002-7125-7036 (L.M.O.); 0000-0002-1181-7919 (R.E.K.); 0000-  
26 0002-2020-2238 (B.F.N); 0000-0003-4572-3651 (K.L.J); 0000-0002-7972-9544 (E.T.C.); 0000-  
27 0003-2662-5554 (L.F.v.D.).

## 28 **SUMMARY**

29

30 Virus infection is frequently characterized using bulk cell populations. How these findings  
31 correspond to infection in individual cells remains unclear. Here, we integrate high-dimensional  
32 single-cell approaches to quantify viral and host RNA and protein expression signatures using  
33 de novo infection with a well-characterized model gammaherpesvirus. While infected cells  
34 demonstrated genome-wide transcription, individual cells revealed pronounced variation in  
35 gene expression, with only 9 of 80 annotated viral open reading frames uniformly expressed in  
36 all cells, and a 1000-fold variation in viral RNA expression between cells. Single-cell analysis  
37 further revealed positive and negative gene correlations, many uniquely present in a subset of  
38 cells. Beyond variation in viral gene expression, individual cells demonstrated a pronounced,  
39 dichotomous signature in host gene expression, revealed by measuring host RNA abundance  
40 and post-translational protein modifications. These studies provide a resource for the high-  
41 dimensional analysis of virus infection, and a conceptual framework to define virus infection as  
42 the sum of virus and host responses at the single-cell level.

43

## 44 **HIGHLIGHTS**

- 45 • CyTOF and scRNA-seq identify wide variation in gene expression between infected cells.
- 46 • Host RNA expression and post-translational modifications stratify virus infection.
- 47 • Single cell RNA analysis reveals new relationships in viral gene expression.
- 48 • Simultaneous measurement of virus and host defines distinct infection states.

## 49 INTRODUCTION

50

51       Gammaherpesviruses ( $\gamma$ HVs) are a subfamily of the *Herpesviridae* characterized by their  
52 ability to establish latency in lymphoid cells and their association with numerous malignancies  
53 (Barton et al., 2011; Cesarman, 2014; Zamora, 2011). The  $\gamma$ HVs include the human viruses  
54 Kaposi's sarcoma-associated herpesvirus (KSHV, or human herpesvirus 8) and Epstein-Barr  
55 virus (EBV), and murine gammaherpesvirus 68 (MHV68 or  $\gamma$ HV68; ICTV nomenclature, *murid*  
56 *herpesvirus 4*, MuHV-4), a model system for its human virus counterparts (Barton et al., 2011;  
57 Dong et al., 2017; Virgin et al., 1997). MHV68 provides a genetically tractable system, capable  
58 of inducing a range of outcomes *in vitro* and *in vivo* (Barton et al., 2011; Forrest and Speck,  
59 2008; Suarez and van Dyk, 2008).

60       Like other herpesviruses, the MHV68 lifecycle is characterized by two major stages: latent  
61 and lytic infection (Pellett and Roizman, 2013). During latent infection, viral gene expression is  
62 limited, with no *de novo* viral replication (Pellett and Roizman, 2013). While latent  $\gamma$ HV infection  
63 is associated with lifelong infection and malignancies, the  $\gamma$ HVs critically rely on lytic infection  
64 for virus replication and transmission between hosts. Lytic infection is characterized by robust  
65 viral gene expression and the production of new infectious virions. The conventional view of  
66 lytic infection is that of a synchronous cascade of gene expression that results in genome-wide  
67 transcription. The paradigm for lytic gene expression was established in bulk cell populations,  
68 stratifying viral gene expression into three broad categories: immediate-early (IE), early (E),  
69 and late (L) gene expression (Johnson et al., 2010; Pellett and Roizman, 2013; Rochford et al.,  
70 2001). IE genes are expressed in the absence of new viral protein synthesis, E genes require  
71 new viral protein synthesis but do not require new viral DNA synthesis, and L genes require  
72 new viral DNA synthesis (Ahn et al., 2002; Ebrahimi et al., 2003; Johnson et al., 2010;  
73 Martinez-Guzman et al., 2003; Pellett and Roizman, 2013). Lytic gene expression can also be

74 stratified by kinetic class, affording a revised perspective on viral gene expression (Cheng et  
75 al., 2012).

76 The advent of high-throughput, single-cell based methods has revealed a more complex  
77 picture of herpesvirus infection, from latent infection (Messinger et al., 2019; Oko et al., 2019;  
78 Shnayder et al., 2018), to lytic infection (Drayman et al., 2019; Oko et al., 2019; Wyler et al.,  
79 2019), reactivation from latency (Adang et al., 2006; Oko et al., 2019) and viral tropism (Sen et  
80 al., 2014). Recently, we identified unanticipated heterogeneity between infected cells during  
81 lytic infection, with wide variance in viral gene expression, from cells with robust viral gene  
82 expression to cells with little to no detectable expression of either viral non-coding RNAs or  
83 mRNAs (Oko et al., 2019). These studies suggest that lytic infection may be more  
84 heterogeneous in individual cells than the perspective revealed by analysis of bulk populations.

85 Though stages of infection are defined based on viral gene expression, lytic infection is  
86 also associated with profound alterations in host gene expression. First, many herpesviruses,  
87 including KSHV, EBV, MHV68, varicella zoster virus (VZV), and Herpes simplex virus (HSV),  
88 induce widespread degradation of host RNAs (i.e. host shutoff) during lytic infection, a  
89 phenomenon associated with decreased expression of cellular housekeeping genes in either  
90 bulk cell populations (Glaunsinger, 2015; Smiley, 2004; Waterboer et al., 2002) or individual  
91 cells (Oko et al., 2019). Viruses have also evolved diverse mechanisms to manipulate host  
92 processes (e.g. cell cycle, apoptosis, protein synthesis and signal transduction) (Chang et al.,  
93 2016). For example, the ORF36 gene of MHV68 and EBV encodes a viral kinase that  
94 phosphorylates H2AX, a proximal marker of the DNA damage response, to facilitate viral  
95 replication (Tarakanova et al., 2007). Recent studies have further demonstrated that the EBV  
96 and KSHV ORF36 homologs target additional host proteins including SAMHD1 and S6K to  
97 impact virus restriction and protein synthesis, respectively (Bhatt et al., 2016; Zhang et al.,  
98 2019). These studies emphasize that measuring host processes commonly targeted by  
99 multiple viruses [including host shutoff (Glaunsinger, 2015), DNA damage responses

100 (Weitzman and Fradet-Turcotte, 2018) and innate signaling (Lee et al., 2015)], may provide an  
101 important, complementary strategy to define viral infection.

102 Here we provide a resource to redefine lytic infection from a single-cell perspective, using  
103 cytometry by time-of-flight (CyTOF, or mass cytometry) and single cell RNA-seq to achieve  
104 high-dimensional, single-cell analysis of viral and host gene expression. These studies reveal:  
105 i) the highly variable nature of viral gene expression between individual cells, with only a small  
106 subset of genes expressed across all cells, ii) the utility of measuring host parameters as a  
107 discriminator to identify infection state, and iii) new insights into infection and gene expression  
108 relationships, previously obscured by bulk cell analysis.

## 109 RESULTS

110

111 *CyTOF analysis identifies a distinct protein expression profile for virally-infected cells.*

112         Recently, we discovered significant variability in viral gene expression between cells  
113 during MHV68 infection (Oko et al., 2019). These studies identified a prominent fraction of cells  
114 with limited viral gene expression, a phenomenon that could arise due to asynchronous  
115 infection, infection with restricted viral gene expression (e.g. latency), or cells resistant to  
116 infection. To define the complexity of virus infection in productively infected cells, we  
117 established a system to purify cells based on expression of the MHV68 latency-associated  
118 nuclear antigen (LANA) protein, a viral gene product expressed during lytic and latent infection  
119 (Rochford et al., 2001). NIH 3T12 fibroblasts, a highly permissive cell line for MHV68 lytic  
120 infection, were infected with a wild-type MHV68 recombinant expressing a LANA:: $\beta$ -lactamase  
121 gene fusion (WT MHV68.LANA $\beta$ lac), followed by FACS purification (Diebel et al., 2015; Nealy  
122 et al., 2010) and high-dimensional single-cell analysis using CyTOF and single cell RNA-  
123 sequencing (scRNA-seq).

124         First, we analyzed virally-infected cells by CyTOF, to obtain a high-dimensional single-  
125 cell analysis of protein expression (Kimball et al., 2018). NIH 3T12 fibroblasts were harvested  
126 at 16 hours post-infection (hpi), a time at which no cytopathic effect or new progeny virus is  
127 released, and sort purified into LANA $\beta$ lac<sup>+</sup> (LANA<sup>+</sup>) and LANA $\beta$ lac<sup>-</sup> (LANA<sup>-</sup>) fractions (Figure  
128 S1A). On average, >94% of cells were LANA<sup>+</sup> at this time, indicating active virus infection in  
129 the vast majority of cells (Niemeyer et al., 2018). Mock-infected 3T12 cells were purified in  
130 parallel. To ensure robust cross-comparison between these populations, each sample was  
131 subjected to isotopic palladium-based barcoding, pooled together, stained with a panel of 23  
132 isotopically-labelled antibodies, with samples collected on a Helios mass cytometer (Figure  
133 1A). Mock-infected, LANA<sup>+</sup> and LANA<sup>-</sup> cells had pronounced differences in clustering and  
134 protein expression profiles (Figure S1B-D). LANA<sup>+</sup> cells robustly expressed the virally-

135 encoded regulator of complement activation (vRCA) protein (Kapadia et al., 1999) and  
136 phosphorylated histone H2AX (pH2AX), a target of the ORF36 viral kinase (Tarakanova et al.,  
137 2007). LANA+ cells further showed increased expression of cell surface proteins (CD9, MHC I)  
138 and cell cycle proteins (Ki-67, phosphorylated Rb [Serine 807/S811]), with modest induction of  
139 signal transduction pathways (activated beta-catenin, pERK1/2, p-p38, pStat1, pStat3, pAKT  
140 and pS6) compared to both LANA- and mock-infected populations (Figure S1C-D). These data  
141 indicate that at the population level, LANA+ cells have a distinct protein expression signature  
142 relative to mock-infected and LANA- cells.

143         Next we quantified the diversity of cellular phenotypes between LANA+ and LANA-  
144 cells. When we applied PhenoGraph, an unsupervised clustering algorithm (Levine et al.,  
145 2015), we identified 14 phenotypes across LANA+, LANA-, and mock-infected populations  
146 (Figure 1B). The frequency of phenotypic clusters varied widely between LANA+ and LANA-  
147 populations (Figure 1C), with 3 clusters exclusively present among LANA+ cells, 5 clusters  
148 uniquely present among LANA- cells, and 6 clusters containing both LANA+ and LANA- cells  
149 (Figure 1C). Clusters exclusively present among LANA+ cells (clusters 1-3, at the bottom of  
150 Figure 1C) were characterized by maximal expression of vRCA and pH2AX, and increased  
151 expression of pRB, pERK1/2, pAKT, and pS6 relative to other cell clusters (Figure 1C).  
152 Expression of other parameters, including CD9, CD29, CD44, CD63, Ki-67 and I $\kappa$ B $\alpha$  did not  
153 strictly correlate with either LANA+ or LANA- cells, indicating that these proteins were not  
154 solely regulated as a function of virus infection (Figure 1C). While high expression of vRCA  
155 and pH2AX was a strong discriminator between clusters exclusively in LANA+ versus LANA-  
156 events, approximately half of LANA+ events expressed low levels of either vRCA or pH2AX,  
157 overlapping with LANA- cells (Figure 1C-D). These data indicate that while many cells  
158 expressing the LANA $\beta$ lac fusion protein had increased virus and host protein expression, there  
159 was a substantial fraction of LANA+ cells that could not be readily distinguished from LANA-



160 cells (clusters colored purple, Figure 1D). These data further identify phosphorylation of H2AX  
161 (i.e. pH2AX) as a robust marker of virus-induced phenotypic changes at the single-cell level.

162

163 *LANA+ cells show heterogeneous protein and post-translational modifications during lytic*  
164 *infection.*

165 To better understand phenotypic heterogeneity among cells with active viral gene  
166 expression (i.e. LANA+ cells), we quantified phenotypic diversity among a large number of  
167 LANA+ cells, clustering cells based on expression of nine cell surface-expressed proteins  
168 (BST2, CD9, CD29, CD44, CD63, Ly6A/E, Ly6C, MHC I, and vRCA). This focused clustering  
169 analysis identified 15 phenotypic clusters within LANA+ cells, which were then visually  
170 inspected based on vRCA, pH2AX, Ly6C, and BST2 expression (Figure 2A-C). LANA+ cells  
171 could be subdivided into cells with high and low viral gene expression, with vRCA and pH2AX  
172 expression tightly overlapping. In contrast, Ly6C and BST2 protein expression was variable  
173 across vRCA<sup>high</sup> pH2AX<sup>high</sup> and vRCA<sup>low</sup> pH2AX<sup>low</sup> cell fractions, indicating that these proteins  
174 did not simply correlate with virus infection (Figure 2B-C). Stratification of LANA+ cells into  
175 pH2AX<sup>high</sup> and pH2AX<sup>low</sup> subsets (Figure S2A) demonstrated that pH2AX<sup>high</sup> cells had  
176 increased expression of vRCA, MHC class I, and multiple phosphorylation-dependent  
177 modifications including pRb, active  $\beta$ -catenin, pERK1/2, pStat1 and pAKT compared to  
178 pH2AX<sup>low</sup> cells (Figure 2D). pH2AX<sup>high</sup> cells also had modestly decreased expression of CD9,  
179 CD29, Ly6A/E, Ly6C and I $\kappa$ B $\alpha$  relative to pH2AX<sup>low</sup> events (Figure 2D). Consistent with the  
180 tight correlation between vRCA and pH2AX expression, LANA+ vRCA<sup>high</sup> cells had increased  
181 expression of pH2AX, MHC class I, pRb, active  $\beta$ -catenin, pERK1/2, pStat1 and pAKT  
182 compared to vRCA<sup>low</sup> cells and modestly reduced I $\kappa$ B $\alpha$  expression (Figure S2B-E). These  
183 studies indicate that vRCA and pH2AX are strong markers of progressive infection among  
184 LANA+ events, with phosphorylated Rb a robust secondary marker associated with a

185 pH2AX<sup>high</sup> vRCA<sup>high</sup> phenotype. These results further indicate that heterogeneous progression  
186 through infection can be revealed by monitoring host protein expression at the single-cell level.  
187  
188 *MHV68-infected cells with a pH2AX<sup>high</sup> vRCA<sup>high</sup> cell phenotype express high viral mRNA and*  
189 *low host actin RNA.*

190 We next investigated how pH2AX and vRCA expression corresponded with viral and  
191 host RNA expression at the single-cell level, using the PrimeFlow methodology to  
192 simultaneously measure protein and RNAs (Okon et al., 2019). This analysis focused on two  
193 RNAs which we previously reported showed heterogeneous expression during MHV68  
194 infection (Okon et al., 2019): i) ORF18, a viral RNA transcribed with late kinetics and ii) Actb, a  
195 host RNA encoding beta-actin that is known to be targeted for degradation by the MHV68 SOX  
196 endonuclease (Covarrubias et al., 2009).

197 As expected, mock-infected cells had no vRCA expression and a low frequency of  
198 pH2AX+ events (Figure 3A). In contrast, MHV68-infected 3T12 cultures exhibited multiple  
199 populations, including: 1) pH2AX- vRCA- cells (population 1, gray box, Figure 3A bottom  
200 panel), 2) pH2AX+ vRCA- cells (population 2, light blue box), 3) pH2AX- vRCA+ cells  
201 (population 3, orange box), and 4) pH2AX+ vRCA+ cells (population 4, red box). As these  
202 studies did not use purified LANA+ cells, in contrast to the CyTOF studies, the presence of  
203 these four populations suggests that these cultures contained a mixture of infected and  
204 uninfected cells.

205 We next queried RNA expression within cells subdivided by pH2AX and vRCA  
206 expression, using ORF18 expression as a direct readout of virus infection and Actb  
207 degradation as a secondary readout of virus infection. Cells with a pH2AX- vRCA- phenotype  
208 (gray box, Figure 3A-B) were present in mock- and MHV68-infected cultures, with the vast  
209 majority of cells characterized by an ORF18- Actb+ phenotype and no evidence of infection  
210 (Figure 3B-C). In contrast, cells with a pH2AX+ vRCA- phenotype (light blue box, Figure 3A-B)

211 contained ~1/3 of cells that were ORF18+ with variable expression of Actb (Figure 3B-C),  
212 identifying infection based on viral RNA expression in the absence of a viral protein. Cells with  
213 a pH2AX- vRCA+ phenotype (orange box, Figure 3A-B) were dominated by ORF18+ Actb- and  
214 ORF18- Actb- cells, demonstrating direct measures of infection by RNA and protein. Lastly,  
215 pH2AX+ vRCA+ cells (red box, Figure 3A-B) were predominantly ORF18+ Actb-, identifying  
216 viral RNA and viral protein expression in the context of host RNA degradation. These data  
217 demonstrate that pH2AX+ vRCA+ cells show progressive infection at the RNA and protein  
218 level, whereas cells expressing only vRCA or pH2AX represent intermediate infection  
219 phenotypes as measured by viral RNA expression and host RNA degradation.

220

221 *scRNA-seq reveals wide variation in the frequency and magnitude of viral RNA expression*

222 We next sought to obtain a global perspective on how MHV68 infection affects gene  
223 expression using scRNA-seq. 3T12 fibroblasts were infected with an MOI of 0.5 PFU/cell using  
224 two viruses with indistinguishable lytic replication [WT MHV68.LANA $\beta$ lac and a viral cyclin-  
225 deficient (cycKO) MHV68.LANA $\beta$ lac (van Dyk et al., 2000)], with LANA+ cells sort purified at  
226 16 hpi (Figure 1A). LANA+ cells were submitted for bulk RNA-seq and scRNA-seq analysis,  
227 with a mean of 94,810 reads per cell for scRNA-seq (Figure S3A-C). While there was some  
228 concordance between the most abundant host RNAs observed in bulk RNA-seq and scRNA-  
229 seq, scRNA-seq analysis revealed wide variability among cells, a level of complexity obscured  
230 in bulk RNA-seq analysis (Figure S3D). We next focused on scRNA-seq, given its capacity to  
231 define intercellular variation and to avoid averaging of signal intensity across a population of  
232 cells. Comparison of scRNA-seq data between WT and CycKO infected cells demonstrated a  
233 similar distribution of cells and gene expression, with only five genes with average gene  
234 expression differences greater than 2-fold (Table S1 and S2), consistent with their comparable  
235 lytic replication in vitro (van Dyk et al., 2000). Therefore, subsequent analysis integrated  
236 scRNA-seq data from LANA+ cells purified from WT and CycKO infection.

237 To understand MHV68 transcription at the single-cell level, we first quantified the  
238 diversity and magnitude of viral transcripts. When viral RNAs (enumerated as unique  
239 molecular identifiers, UMIs) were mapped to the MHV68 genome, 77 of the 80 annotated  
240 MHV68 ORFs were detected. M10b, M10c and M12, three viral RNAs derived from MHV68  
241 repeat structures were the only viral RNAs not detected (Virgin et al., 1997). LANA+ cells  
242 expressed a wide range of viral genes (12-66 viral genes) per cell, with a median of 52 viral  
243 genes per cell, based on detection of  $\geq 1$  UMI per viral gene per cell (Figure 4A). Mean UMI  
244 per viral gene and percentage of cells expressing viral genes were positively correlated  
245 (Spearman  $r$  coefficient = 0.9775), with 86.2% of LANA+ cells expressing the ORF73 RNA  
246 (Figure 4B). Despite cell purification based on uniform LANA expression, total viral UMIs per  
247 cell spanned a >1000-fold range (19-24,718 viral UMIs per cell) (Figure 4C). While the number  
248 of viral genes detected per cell was positively correlated with total viral UMIs per cell, LANA+  
249 cells exhibited a bimodal distribution of virus RNA<sup>high</sup> (Virus<sup>high</sup>) cells (>500 viral UMIs/cell) and  
250 virus RNA<sup>low</sup> (Virus<sup>low</sup>) cells (<500 viral UMIs/cell) (Figure 4C-D). The distinction between  
251 Virus<sup>high</sup> and Virus<sup>low</sup> cells was not simply explained by how many viral genes were detected  
252 per cell, as some cells expressed the same number of viral genes yet showed a >10-fold  
253 variance in total viral UMIs (e.g. the range of viral UMIs among cells that express 40 viral  
254 genes per cell, Figure 4D).

255 To better understand viral transcription at the single-cell level, we quantified the  
256 percentage of cells expressing each viral gene (Figure 4E) and mean UMI count within positive  
257 cells (Figure 4F). The percentage of cells which expressed viral genes varied widely, with 9  
258 viral genes (M3, ORF7, ORF17, ORF38, ORF45, ORF52, ORF58, M9, and ORF66) expressed  
259 in the vast majority (98.63-100%) of cells (Figure 4E). These ubiquitous viral RNAs spanned  
260 transcriptional categories [IE (ORF38), Early-Late (M3, ORF7), and L genes (ORF17, ORF45,  
261 ORF52, ORF58, M9, ORF66)] and kinetic classes [class I (ORF38), class II (M3, ORF45,  
262 ORF52, ORF58), class III (ORF17, M9, ORF66) and class IV (ORF7)] (Cheng et al., 2012). In

263 contrast, many viral genes were only detected in a subset of cells, including ORF50, an IE  
264 gene that encodes Rta, a major transcriptional regulator of lytic replication (Figure 4E). The  
265 range of expression for individual genes varied widely (Figure 4F). While many viral genes had  
266 a mean UMI per viral gene between 1-10 UMIs per cell, the most highly expressed viral gene  
267 ORF52 had a mean of >1000 UMIs per cell.

268

### 269 *Visualization of genome-wide viral gene expression at the single-cell level*

270 To investigate the complexity of gene expression across MHV68-infected cells, we next  
271 visualized the absolute UMI count for each viral gene across all 1,605 LANA+ cells. Cells were  
272 rank-ordered based on total viral UMIs detected per cell, from Virus<sup>low</sup> to Virus<sup>high</sup> cells across a  
273 1000-fold range of viral UMIs per cell, with each row depicting expression for each MHV68  
274 viral gene and each column depicting data from a single cell (Figure 5). This continuum of  
275 gene expression revealed multiple patterns of gene expression. First, there were some viral  
276 genes (e.g. ORF59 and ORF73βlac, which encodes LANA) which were detected in almost all  
277 cells, with only modest differences in expression between cells with the fewest viral UMIs and  
278 the greatest viral UMIs (Figure 5). Second, viral genes such as M3 and ORF52 progressively  
279 increased in expression, proportional to the increase in viral UMIs (Figure 5). Third, viral  
280 genes, including ORF48, ORF54, and ORF57, showed maximal expression in cells with  
281 intermediate viral counts (Figure 5). By stratifying cells into either Virus<sup>high</sup> or Virus<sup>low</sup>  
282 categories (a bifurcation identified in Figure 4C-D), we identified a subset of genes including  
283 K3, ORF42 and ORF44 whose expression was sporadic in Virus<sup>low</sup> cells and uniform in  
284 Virus<sup>high</sup> cells (Figure 5 and Figure S4). ORF68 was one of the only genes whose expression  
285 was slightly higher among Virus<sup>low</sup> cells compared to Virus<sup>high</sup> cells (Figure 5 and Figure S4).  
286 Gene expression signatures for Virus<sup>low</sup> and Virus<sup>high</sup> cells did not clearly track with any  
287 transcriptional or kinetic class, and individual genes within these distinctions demonstrated

288 significant gene to gene variation (Figure S5A). These data identify the highly variable nature  
289 of MHV68 transcription between individual cells during de novo infection.

290

291 *MHV68-infected cells can be stratified by differential abundance of virus and host RNAs*

292 To clarify the patterns of gene expression that we observed, we used unsupervised K-  
293 means clustering to identify related cells. By clustering on viral and cellular RNA expression,  
294 we identified 5 clusters among LANA+ cells (Figure 6A). 3-dimensional tSNE-based data  
295 visualization further identified that an IE gene (ORF50) had maximal expression in clusters A  
296 and B, an early-late (E-L) gene (ORF47) had maximal expression in clusters B and C, and a L  
297 gene (M7) had maximal expression in clusters D and E (Figure 6B and Figure S5B). In  
298 contrast, host Actb RNA, a target of virus-induced host shutoff mediated by the ORF37 gene,  
299 showed maximal expression in clusters A and B, with low expression across clusters C  
300 through E (Figure 6B-C). These data suggested that at this timepoint, LANA+ cells had  
301 heterogeneous virus-induced host shutoff. Cells with a high percentage of viral UMIs were  
302 predominant in clusters C through E, in contrast to cells with a high frequency of host UMIs  
303 prevalent in clusters A and B (Figure 6D). Based on these distinctions, we divided cells into  
304 virus-based and host-biased groups (Figure 6E-F).

305 The different proportions of viral and host UMIs between virus- and host-biased cells  
306 could result from changes in either how many viral or host genes were expressed, or mean  
307 expression per gene. Notably, the number of virus genes expressed (defined by mean UMI per  
308 cell  $\geq 1$ ) was comparable between virus-biased and host-biased cells (Figure 6G). In contrast,  
309 virus-biased cells were characterized by a pronounced decrease in the number of host RNAs  
310 expressed, compared to host-biased cells (Figure 6H). When we analyzed gene expression  
311 levels, virus-biased cells had increased viral gene expression per cell compared to host-biased  
312 cells, with no significant difference in host gene expression among expressed genes (Figure  
313 6I). These data indicate that virus-biased cells have increased viral gene expression, coupled

314 with a pronounced reduction in the number of detectable host RNAs. While cell cycle-  
315 associated gene signatures were relatively comparable between virus-biased and host-biased  
316 cells, host-biased cells expressed a number of interferon-response genes (Figure S6 and  
317 Table S3), suggesting a potential role in resistance to infection.

318 Although stages of virus infection are typically defined by viral parameters only, the  
319 observations of: i) Virus<sup>high</sup> and Virus<sup>low</sup> cells (Figure 4D), and ii) Virus-biased and host-biased  
320 cells (Figure 6G), suggested that these two processes may be connected. Indeed, when we  
321 analyzed the distribution of cells based on the sum of all host UMIs versus the sum of all viral  
322 UMIs, we found three prominent populations (Figure 6J-K): 1) 72.8% of cells had high viral  
323 RNA expression with reduced host RNA expression (i.e. Virus<sup>high</sup> Host<sup>low</sup>, in red, Figure 6K), 2)  
324 11.1% of cells had a Virus<sup>high</sup> Host<sup>high</sup> phenotype (in orange, Figure 6K), and 3) 14.4% of cells  
325 had a Virus<sup>low</sup> Host<sup>high</sup> phenotype (in blue, Figure 6K). The number of Virus<sup>low</sup> Host<sup>high</sup> cells  
326 almost completely corresponded with the number of Virus<sup>low</sup> events which we previously  
327 identified (Figure 4D), with less than two percent of cells expressing a Virus<sup>low</sup> Host<sup>low</sup>  
328 phenotype (Figure 6J). By comparing viral gene expression across these 3 populations, we  
329 found that an IE gene (ORF50) and E-L gene (ORF47) had peak expression in Virus<sup>high</sup>  
330 Host<sup>high</sup> cells, intermediate expression in Virus<sup>high</sup> Host<sup>low</sup> cells, with limited expression in  
331 Virus<sup>low</sup> Host<sup>high</sup> cells (Figure 6L-M). In contrast, a L gene (M7) had high expression exclusively  
332 in Virus<sup>high</sup> Host<sup>low</sup> cells (Figure 6N). Virus<sup>low</sup> Host<sup>high</sup> cells had lower expression across many  
333 virus genes, with the exception of ORF68 which was modestly higher in Virus<sup>low</sup> Host<sup>high</sup> cells  
334 compared to other cells (Figure 6O). Actb, a known target of virus-induced shutoff, retained  
335 high expression in both Virus<sup>low</sup> Host<sup>high</sup> and Virus<sup>high</sup> Host<sup>high</sup> cells with a pronounced decrease  
336 in Virus<sup>high</sup> Host<sup>low</sup> cells (Figure 6P). These data demonstrate that while many LANA+ cells  
337 show signs of robust viral RNA expression coupled with reduced host RNAs, subsets of  
338 LANA+ cells express high levels of host RNAs with differential viral RNA abundance.

339

340 *Correlation analysis reveals positive and negative correlations in MHV68 transcription at the*  
341 *single-cell level.*

342 Finally, we sought to investigate the inter-relationships between viral genes, leveraging  
343 the unique insights obtained from single-cell data. Initially, we generated a correlation matrix of  
344 all viral gene-gene expression relationships querying all LANA+ cells. This correlation matrix  
345 identified that the majority of gene-gene pairs had a positive correlation (83.6%, depicted in  
346 blue), with fewer negative correlations (16.1%, depicted in red) (Figure S7). We next examined  
347 gene-gene relationships in Virus<sup>high</sup> or Virus<sup>low</sup> cells. While the majority of gene-gene  
348 relationships in Virus<sup>high</sup> and Virus<sup>low</sup> cells were positive correlations, Virus<sup>high</sup> cells revealed an  
349 increased frequency of negative correlations (29.1%) among a subset of viral genes (Figure 7A  
350 and S7).

351 We next sought to investigate gene-gene relationships as of function of Virus<sup>high</sup> or  
352 Virus<sup>low</sup> cells. On the one hand, there were some gene pairs whose relationship was preserved  
353 between Virus<sup>high</sup> and Virus<sup>low</sup> cells, exemplified by ORF50 and ORF57, and ORF54 and  
354 ORF57, both showing positive correlations across Virus<sup>high</sup> and Virus<sup>low</sup> cells (Figure 7B-C). On  
355 the other hand, there were other gene pairs whose relationship was distinct between Virus<sup>high</sup>  
356 and Virus<sup>low</sup> cells. These included ORF50 and M9, and ORF54 and ORF64, with minimal  
357 correlation across total cells, a negative correlation in Virus<sup>high</sup> cells, and minimal correlation  
358 among Virus<sup>low</sup> cells (Figure 7B). The complexity of gene-gene expression relationships was  
359 clearly demonstrated by plotting gene-by-gene expression levels from total cells (Figure 7C-D).  
360 Predicted correlations were exemplified by a positive correlation between host RNAs Actb and  
361 Gapdh and a negative correlation between Actb and ORF64 (Figure 7C-D). While positive  
362 correlations between ORF50 and ORF57, and ORF57 and ORF54 were consistent across all  
363 events, the relationships between ORF50 and M9, ORF64 and ORF54 were more complex  
364 (Figure 7D). These data emphasize that gene-gene coexpression relationships can be



- 365 obscured by combining cell subsets, and emphasize the value of single-cell approaches to
- 366 define gene expression inter-relationships within homogeneous cell populations.

367 **DISCUSSION**

368

369 In this manuscript, we present a strategy to investigate viral infection, simultaneously  
370 quantifying viral and host RNA and protein expression in individual cells. This approach  
371 provides a conceptual framework to understand how individual cells respond to virus infection  
372 at the protein and RNA level, presents new insights into the complexity of virus infection from  
373 virus and host perspective, and establishes high-dimensional datasets as a resource for further  
374 analysis of virus-host interactions at the single-cell level. By focusing on a well-characterized  
375 virus, tightly controlled infection conditions, and cells with uniform viral gene expression, these  
376 studies emphasize the knowable complexity of infection in individual cells and the limitations of  
377 studying infection in bulk cell populations.

378

379 *Implications*

380 Our studies illustrate the power of defining virus infection by quantifying viral and host  
381 gene expression across individual cells and have significant implications for understanding  
382 virus-host interactions. First, our data highlight that gene expression analysis in a population of  
383 cells conceals wide variance in virus infection, specifically failing to identify cells with low gene  
384 expression and obscuring negative feedback mechanisms. Second, our data emphasize that  
385 defining virus infection strictly by viral gene expression ignores the essential contribution of the  
386 host cell to this process, and that virus infection stage may be more appropriately considered  
387 as the integrated impact of virus on the host. Quantitation of host RNAs and virus-dependent  
388 post-translational host modifications were particularly informative in discriminating between  
389 infection subtypes, while measures of protein abundance were less impactful. Third, our data  
390 suggest that phenotypic variation between cells, or input virions, results in cell subsets with  
391 restricted viral gene expression, a potentially novel strategy to identify negative regulators of  
392 infection. While the relative contribution of host and virus variation to these diverse outcomes

393 remains to be addressed, there is an increasing breadth of literature in support of phenotypic  
394 variation from both sides (e.g. (Avraham et al., 2015; Chaturvedi et al., 2020; Hansen et al.,  
395 2018; Shaffer et al., 2017)). We propose that integrated single-cell analysis of virus and host  
396 will be particularly informative to understand how viral and host genes regulate infection,  
397 whether influencing viral or host gene expression, and/or altering the relative proportion of  
398 permissive or resistant cells. Fourth, these studies provide an opportunity to reassess  
399 fundamental concepts in virology, including how variation in virus (e.g. differing ratios in  
400 particle:PFU ratio (Van Skike et al., 2018)) or the host cell integrate to impact infection  
401 outcome. We anticipate that further studies, combined with further mining of these datasets by  
402 the community, will identify new rules governing virus infection that may be pharmacologically  
403 targeted.

404

#### 405 *Insights into herpesvirus infection*

406 Herpesvirus infection is classically divided into lytic infection, that generates new  
407 infectious virions, and latent infection, that facilitates long-term persistence in host cells while  
408 avoiding immune detection. Lytic infection is frequently understood as a coordinated cascade  
409 of gene expression, characterized by genome-wide transcription (Pellett and Roizman, 2013).  
410 High resolution mapping of coding and non-coding viral RNAs (Cheng et al., 2012; O'Grady et  
411 al., 2019) and new molecular insights into the regulation of viral RNA transcription and  
412 abundance (Hartenian et al., 2020) have further refined models of lytic gene expression.  
413 Despite these advances, most studies have analyzed bulk cell populations, obscuring  
414 intercellular heterogeneity.

415 Here, we provide three new datasets, with two complementary high-dimensional single-  
416 cell approaches, CyTOF and scRNAseq, to investigate *de novo*  $\gamma$ HV infection of cells that are  
417 highly permissive for lytic infection. These studies build on our recent analysis of MHV68 gene  
418 expression during *de novo* infection, studies that revealed asynchronous or inefficient infection

419 among MHV68-exposed cells (Oko et al., 2019). Here, we extended these studies, purifying  
420 actively-infected cells (defined by expression of the viral protein LANA, which is expressed  
421 during lytic and latent infection) and deeply characterizing RNA and protein expression profiles  
422 during *de novo* infection. By monitoring viral and host RNAs and proteins, these studies  
423 defined robust markers of productive lytic infection and revealed heterogeneity in progression  
424 following *de novo* infection.

425         These studies initially focused on how MHV68 infection influences cellular responses at  
426 the protein level using CyTOF. By comparing cells with or without signs of active infection, we  
427 found multiple infection phenotypes. First, LANA+ cells contained a prominent cell fraction that  
428 co-expressed high levels of a viral protein, vRCA, and phosphorylation of histone H2AX, a  
429 virus-dependent event. vRCA<sup>high</sup> pH2AX<sup>high</sup> cells were only found in LANA+ cells, and were  
430 further characterized by increased phosphorylation of host proteins (pRb, active  $\beta$ -catenin,  
431 pERK1/2, pStat1 and pAKT) consistent with reports of  $\gamma$ HV-induced modulation of the host  
432 proteome (Chang et al., 2016). vRCA<sup>high</sup> pH2AX<sup>high</sup> cells also had a prominent RNA phenotype,  
433 ORF18<sup>high</sup> (late viral RNA) and Actb<sup>low</sup> (host RNA indicator of virus-induced host shutoff). While  
434 vRCA<sup>high</sup> pH2AX<sup>high</sup> ORF18 RNA<sup>high</sup> Actb RNA<sup>low</sup> cells showed the most progressive signs of  
435 infection, we readily identified additional cell subsets expressing viral RNA in the absence of  
436 viral protein or host-shutoff, potentially reflecting delayed infection or a disconnect between  
437 transcription and translation. These studies identify vRCA and pH2AX as strong indicators of  
438 robust and progressive virus infection, and indicate that including additional viral and host  
439 indicators can distinguish among diverse infection stages.

440         We next turned to scRNA-seq to gain a broader understanding of virus and host RNA  
441 expression during *de novo* infection. Though we anticipated that many LANA+ cells (i.e.  
442 vRCA<sup>high</sup> pH2AX<sup>high</sup> cells) would express high viral RNAs and low host RNAs (exemplified by  
443 ORF18 and Actb, respectively), the relative homogeneity of LANA+ cells at the RNA level was  
444 unknown. One of the most striking outcomes of these studies was the wide range of viral and

445 host gene expression observed at the single-cell level, derived from infection with a low MOI,  
446 and harvested at a single timepoint. LANA+ cells had a 1000-fold variance in total viral reads  
447 per cell, with cells expressing between 12-66 viral genes per cell and widespread variance in  
448 both the frequency and expression level of viral RNAs. While this analysis mapped RNAs to 77  
449 of the 80 annotated MHV68 ORFs (Virgin et al., 1997) using a 3' based sequencing platform, it  
450 is notable that: i) only one viral gene (ORF52) was detected in 100% of LANA+ cells, with ii)  
451 only 9 viral genes (M3, ORF7, ORF17, ORF38, ORF45, ORF52, ORF58, M9, and ORF66)  
452 expressed in a high percentage (>98.5%) of LANA+ cells. Though many of these genes were  
453 highly expressed on a per cell basis, a high frequency of expression does not solely track with  
454 high expression. For example, ORF73 RNA, which encodes for LANA, was detected in 86.2%  
455 of cells with an average of 5 UMIs per cell. Lack of detection of ORF73 in LANA+ sort purified  
456 cells may seem to be a paradox, as cells were purified based on LANA+ cells. This apparent  
457 discordance may either be due to RNA dropout or to cells expressing LANA protein in the  
458 absence of ORF73 RNA. For other genes, limited detection likely reflects extremely low  
459 expression during lytic infection [e.g. M2, a latency-associated gene that has not historically  
460 been detected during lytic infection (Rochford et al., 2001; Virgin et al., 1999)]. These results  
461 suggest that lack of detection of some MHV68 genes is likely due to little to no expression  
462 during lytic infection and not due to technical issues with scRNA-seq. More broadly, these  
463 studies indicate that stratifying gene expression by the IE→E→L paradigm, or by kinetic class,  
464 is insufficient to describe the complexity of viral transcription in individual cells, even in a highly  
465 permissive cell type.

466 An important complementary perspective on virus infection was our capacity to assess  
467 how MHV68 infection remodels host RNA expression. Virus-biased cells expressed 1.5 times  
468 more viral UMIs than host UMIs, a striking result when considering that there are only 80  
469 annotated viral ORFs (Virgin et al., 1997) compared to ~25,000 host genes (Guenet, 2005).  
470 Virus:host RNA skewing was further driven by a dramatic reduction in host gene expression,

471 consistent with virus-induced host shutoff (Covarrubias et al., 2011). Host shutoff was readily  
472 visualized by pronounced reduction in ActB RNA expression in vRCA<sup>high</sup> pH2AX<sup>high</sup> cells,  
473 illustrating the value of monitoring host RNAs at the single-cell level as an indicator of virus  
474 infection. When we assessed the global relationship between virus and host RNAs, we found  
475 additional complexity. While most LANA+ cells (73%) showed a reciprocal relationship  
476 expression of high viral RNAs and low host RNAs (i.e. Virus<sup>high</sup> Host<sup>low</sup>), there were substantial  
477 cell fractions that were either Host<sup>high</sup>Virus<sup>high</sup> or Virus<sup>low</sup> Host<sup>high</sup>, suggesting delayed or  
478 impaired virus-induced host shutoff (a process that requires transcription, translation and  
479 nuclease-dependent degradation of RNAs (Covarrubias et al., 2011)).

480

#### 481 *Potential relationships of virus infection phenotypes*

482 The identification of distinct infection phenotypes raises the question of how these  
483 subsets are inter-related. Though definitive lineage relationships require sequential tracking of  
484 individual infected cells, we postulate that the Virus<sup>high</sup> Host<sup>high</sup> phenotype identifies cells with  
485 slower progression through lytic infection, preceding Virus<sup>high</sup> Host<sup>low</sup> cells. In contrast, we  
486 speculate that Virus<sup>low</sup> Host<sup>high</sup> cells may represent a distinct biological outcome. Although  
487 Virus<sup>low</sup> cells expressed fewer viral genes, frequently at a lower magnitude, these cells  
488 contained viral RNAs from all phases of infection, with 90% of Virus<sup>low</sup> cells expressing IE  
489 (ORF38), E or E-L (M3, ORF7, ORF68) or L (ORF17, ORF45, ORF52, ORF58, M9, ORF66)  
490 genes; these genes span kinetic classes, indicating that there is not a specific block in infection  
491 (Cheng et al., 2012). Virus<sup>low</sup> cells did contain a few viral genes (e.g. ORF68) that are modestly  
492 increased relative to Virus<sup>high</sup> cells; nonetheless, the Virus<sup>low</sup> gene signature would be  
493 obscured in bulk cell analysis. The molecular basis of the Virus<sup>low</sup> Host<sup>high</sup> phenotype remains  
494 to be determined but could arise from host or virus variation. Curiously, Virus<sup>low</sup> cells  
495 expressed multiple interferon-stimulated genes, but not type I interferons, suggesting a  
496 potential cell-intrinsic block to lytic infection. The Virus<sup>low</sup> Host<sup>high</sup> phenotype may also arise

497 from virus-intrinsic differences (e.g. variation in particle:PFU differences (Klasse, 2015) or  
498 virus-like vesicles (Gong et al., 2017)). Variable outcomes of  $\gamma$ HV infection have been reported  
499 in multiple contexts. MHV68 infection of endothelial cells results in a significant cell fraction of  
500 cells undergoing persistent infection (Suarez and van Dyk, 2008). KSHV infection of fibroblasts  
501 results in variable lytic or latent infection (Jang et al., 2016; Krishnan et al., 2004; Matthews et  
502 al., 2011), and EBV infection in gastric epithelial cells includes both lytic and latent outcomes  
503 (Hill et al., 2013; Ma et al., 2011; Nawandar et al., 2015). Despite the restricted gene  
504 expression of Virus<sup>low</sup> cells, expression of multiple viral genes strongly suggests that these  
505 cells have the potential to impact biological outcomes and immune regulation.

506

#### 507 *Virus gene-gene relationships revealed by scRNA-seq*

508 Virus infection involves the coordination of highly complex gene expression patterns, a  
509 poorly understood process at the single-cell level. Given this knowledge gap, we leveraged the  
510 unique insights of scRNA-seq to quantify genome-wide correlation matrices. Unexpectedly, we  
511 found gene pairs which were differentially regulated between Virus<sup>high</sup> or Virus<sup>low</sup> subsets,  
512 including pronounced negative correlations among Virus<sup>high</sup> cells. The complexity of these  
513 relationships was illustrated by examining correlations between ORF50 and other viral genes.  
514 ORF50 encodes the Rta viral transactivator and is known to both induce and repress  
515 transcriptional targets (Coleman et al., 2005; Damania et al., 2004; Hair et al., 2007; Pavlova  
516 et al., 2005; Wu et al., 2000). Correlation analysis among Virus<sup>high</sup> cells corroborated  
517 established ORF50 targets (e.g. positive correlation with ORF57, negative correlation with  
518 ORF73) and identified new potential relationships (e.g. positive correlation with ORF54 and M8  
519 and negative correlation with ORF64-67). These findings emphasize the importance of defining  
520 gene expression relationships in biologically homogeneous populations, something uniquely  
521 afforded by single-cell analysis.

522 Our scRNA-seq analysis quantified viral RNA abundance in LANA+ cells, mapping  
523 RNAs to the annotated MHV68 genome using polyA-primed sequencing. This resource  
524 illustrates the complexity of viral RNA expression following *de novo*  $\gamma$ HV infection and sets the  
525 foundation for new insights in gene expression in individual cells, including how virion-  
526 packaged RNAs shape expression, the relative contribution of transcription and RNA decay to  
527 the transcriptome, and RNA:protein relationships in individual cells (Hartenian and  
528 Glaunsinger, 2019; Purushothaman et al., 2015; Ruiz et al., 2019). This approach further  
529 emphasizes that not all abundant viral RNAs are equally expressed at the single-cell level, and  
530 argue for the importance of single-cell analysis to identify candidate immunogens based on  
531 uniform, high expression.

532 In total, these studies provide a resource to understand the complexity of virus-host  
533 interactions within individual cells. This work provides three databases from matched *de novo*  
534 gammaherpesvirus infection of a single permissive cell type, from CyTOF to bulk RNA-seq to  
535 scRNA-seq, and exemplify the power of these approaches to reveal new insights into virus-  
536 host interaction during  $\gamma$ HV infection. We anticipate that these data will serve as an important  
537 benchmark for future studies of virus infection, providing a wealth of observations to further  
538 revise our understanding of virus-host interactions.



539 **ACKNOWLEDGEMENTS**

540 The authors would like to acknowledge insightful comments made by the members of  
541 the Clambey and van Dyk laboratories, and the laboratories of Dr. Kelly Doran and Dr. Laurel  
542 Lenz for equipment and reagents. We acknowledge flow cytometry support through  
543 ClinImmune and the Department of Immunology & Microbiology, CyTOF services through the  
544 Flow Cytometry Shared Resource (FCSR) of the University of Colorado Cancer Center  
545 (UCCC), expert technical assistance regarding CyTOF from Christine Childs and Karen Helm,  
546 receipt of CyTOF antibodies through the coordinated efforts of the FCSR and the Human  
547 Immune Monitoring Shared Resource, and support of sequencing through the Genomics  
548 Shared Resource of the UCCC.

549

550 **FUNDING**

551 This research was funded by National Institutes of Health grants R01CA103632 and  
552 R01CA168558 to L.F.V.D., R21AI134084 to E.T.C. and L.F.V.D., T32AI052066 to J.L.B., and  
553 Colorado CTSI Novel Methods grant to E.T.C.. The Colorado CTSI is supported by  
554 NIH/NCATS Colorado CTSA Grant Number UL1 TR002535. The Flow Cytometry, Genomics,  
555 and Human Immune Monitoring Shared Resources of the University of Colorado Cancer  
556 Center receive direct funding support from the National Cancer Institute through Cancer  
557 Center Support Grant P30CA046934. Contents are the authors' sole responsibility and do not  
558 necessarily represent official NIH views. The funders had no role in study design, data  
559 collection and analysis, decision to publish, or preparation of the manuscript.

560

561 **DECLARATION OF INTERESTS**

562 The authors declare no competing interests.

563 **AUTHOR CONTRIBUTIONS**

564 Conceptualization: Jennifer N. Berger, Brian F. Niemeyer, Eric T. Clambey, Linda F. van Dyk

565 Data curation: Bridget Sanford, Abigail K. Kimball, Kenneth L. Jones, Eric T. Clambey

566 Formal analysis: Jennifer N. Berger, Bridget Sanford, Abigail K. Kimball, Kenneth L. Jones,

567 Eric T. Clambey

568 Funding acquisition: Eric T. Clambey, Linda F. van Dyk

569 Investigation: Jennifer N. Berger, Lauren M. Oko, Rachael E. Kaspar, Brian F. Niemeyer

570 Methodology: Jennifer N. Berger, Bridget Sanford, Lauren M. Oko, Abigail K. Kimball, Rachael

571 E. Kaspar, Brian F. Niemeyer, Kenneth L. Jones

572 Project administration: Eric T. Clambey, Linda F. van Dyk

573 Resources: Jennifer N. Berger, Bridget Sanford, Abigail K. Kimball, Kenneth L. Jones, Eric T.

574 Clambey, Linda F. van Dyk

575 Software: Abigail K. Kimball, Eric T. Clambey, Bridget Sanford, Kenneth L. Jones

576 Supervision: Eric T. Clambey, Linda F. van Dyk

577 Validation: Jennifer N. Berger, Bridget Sanford, Abigail K. Kimball, Eric T. Clambey, Linda F.

578 van Dyk

579 Visualization: Jennifer N. Berger, Bridget Sanford, Abigail K. Kimball, Kenneth L. Jones, Eric

580 T. Clambey, Linda F. van Dyk

581 Writing – original draft: Jennifer N. Berger, Eric T. Clambey, Linda F. van Dyk

582 Writing – review & editing:

583 **FIGURE LEGENDS**

584

585 **Figure 1. CyTOF analysis identifies a distinct protein expression profile for virally-**  
586 **infected cells.** High-dimensional single-cell protein analysis of MHV68 infection by CyTOF. (A)  
587 3T12 fibroblasts were either mock or MHV68-infected with WT MHV68.LANA $\beta$ lac (MOI=0.5),  
588 with indicated populations FACS purified according to LANA:: $\beta$ -lactamase expression at 16  
589 hours pi. (B) PhenoGraph analysis of mock, LANA- and LANA+ cells subjected to CyTOF  
590 analysis and visualized by tSNE-based dimensionality reduction identified 14 cell clusters  
591 (colored by cluster ID). (C) Comparison of the frequency (left) and protein expression profile  
592 (right) of PhenoGraph-defined clusters in LANA- and LANA+ samples. Clusters (in rows),  
593 ranked from those exclusively in LANA- samples (top) to those exclusively in LANA+ samples  
594 (bottom); asterisks indicate clusters statistically significantly different between conditions,  
595 defined by unpaired t-test corrected for multiple comparisons using the Holm-Sidak method,  
596  $p < 0.05$ . Data show mean  $\pm$  SEM with individual symbols indicating individual sample values  
597 ( $n=4$  per group). Relative protein expression for each cluster (right panel) is indicated by  
598 heatmap intensity, with protein markers divided by functional categories. (D) tSNE plot of  
599 LANA- and LANA+ cells colored according to LANA- and LANA+ exclusivity (left), vRCA  
600 expression (middle), and pH2AX expression (right panel). Red and blue lines identify events  
601 exclusive to LANA+ or LANA- clusters (left panel). Ruler defines range of expression with  
602 values calculated using the equation  $\text{arcsinh}(x/5)$  where  $x$  is raw expression value. Live, DNA+  
603 cells ( $^{191}\text{Ir}+$   $^{193}\text{Ir}+$   $^{195}\text{Pt}-$ ) were imported into PhenoGraph with 9,162 events total analyzed  
604 (1,018 events from each sample;  $n=1$ , mock,  $n=4$  each for LANA+ and LANA- samples),  
605 clustered on 9 cell surface proteins (vRCA, BST2, CD9, CD29, CD44, CD63, Ly6A/E, Ly6C,  
606 and MHCI). **See also Figure S1.**

607

608 **Figure 2. LANA+ cells show heterogeneous protein and post-translational modifications**  
609 **during lytic infection.** CyTOF analysis of LANA+ MHV68-infected cells as in Figure 1. (A)  
610 PhenoGraph analysis of 40,000 LANA+ cells (10,000 cells/sample, 4 samples) clustered by 9  
611 cell surface proteins (vRCA, BST2, CD9, CD29, CD44, CD63, Ly6A/E, Ly6C, and MHCI)  
612 identified 15 unique cellular clusters colored by cluster ID and displayed on a tSNE plot. (B)  
613 LANA+ cells can be stratified into six categories based on expression of pH2AX, vRCA, Ly6C,  
614 and BST2, with (C) LANA+ cells colored by expression levels for each protein marker. Ruler  
615 defines range of expression with values calculated using the equation  $\text{arcsinh}(x/5)$  where x is  
616 raw expression value. (D) LANA+ cells were divided into pH2AX<sup>Lo</sup> and pH2AX<sup>Hi</sup> events, and  
617 compared for raw median expression. Data depict proteins whose expression was statistically  
618 significantly different between pH2AX<sup>Lo</sup> and pH2AX<sup>Hi</sup> events. Data depict mean  $\pm$  SEM with  
619 individual symbols indicating values from independent samples (n=4/group). All samples were  
620 analyzed for statistical significance using unpaired t tests, corrected for multiple comparisons  
621 using the Holm-Sidak method, with statistical significance denoted as \*p<0.05, \*\* p<0.01,  
622 \*\*\*p<0.001. **See also Figure S2.**

623  
624 **Figure 3. MHV68-infected cells with a pH2AX<sup>high</sup> vRCA<sup>high</sup> cell phenotype express high**  
625 **viral mRNA and low host actin RNA.** Flow cytometric analysis of protein and RNA  
626 expression in 3T12 fibroblasts infected with MHV68 (MOI=0.5, harvested 16 hpi). (A) Analysis  
627 of vRCA and pH2AX protein expression in mock and MHV68-infected cultures identified four  
628 populations denoted by numbers and color (1=Gray, 2=Blue, 3=Orange, 4=Red). (B) Analysis  
629 of viral ORF18 and host Actin (Actb) mRNA expression across four populations of MHV68-  
630 infected cultures, stratified by vRCA and pH2AX expression. Border color of biaxial plots  
631 corresponds to the parent population stratified by protein expression in panel A. (C)  
632 Quantitation of the frequency of cells based on RNA expression profile as in panel B, depicting

633 mean  $\pm$  SEM from 3 independent experimental samples. Flow cytometric analysis was done  
634 on singlets, following gating to remove doublets.

635

636 **Figure 4. scRNA-seq reveals wide variation in the frequency and magnitude of viral RNA**  
637 **expression.** scRNA-seq analysis of MHV68 viral gene expression in LANA+ 3T12 fibroblasts  
638 as in Figure 1A. (A) LANA+ cells show a wide range in how many viral genes are expressed on  
639 a per-cell basis. Expression of a viral gene was defined conservatively as any viral gene with  
640  $\geq 1$  UMI detected per cell, with data showing the distribution of cells based on number of viral  
641 genes expressed per cell. (B) Viral genes vary widely in mean UMI per cell and the frequency  
642 of cells expressing an individual viral gene. Mean viral UMI per cell was calculated from  
643 positive cells that expressed  $\geq 1$  UMI per gene, with five representative genes identified by  
644 unique shading. Each dot represents expression for a single viral gene product for all 80  
645 annotated MHV68 open reading frames. (C) The distribution of cells based on total viral UMIs  
646 reveals a bimodal distribution of virus low and virus high cells. (D) Total viral UMIs per cell as a  
647 function of the number of viral genes detected per cell (as in panel A). Cells demonstrate a  
648 bimodal distribution of total viral UMIs with virus high and low cells, with a positive Spearman  
649 correlation coefficient,  $r_s$ , as indicated. (E) Frequency of cells expressing each viral gene, with  
650 viral gene expression defined as  $\geq 1$  UMI for each viral gene. Dashed line indicates 50% of  
651 events. (F) Mean UMI count per viral gene, defined by calculating mean value only from  
652 positive cells ( $\geq 1$  UMI for each viral gene), depicting mean  $\pm$  SD. Data represent scRNA-seq  
653 data from all LANA+ cells (n=1605 cells). nd, genes that were not detected. **See also Figure**  
654 **S3 and Table S1.**

655

656 **Figure 5. Visualization of genome-wide viral gene expression at the single-cell level.**

657 scRNA-seq analysis of MHV68 gene expression in LANA+ 3T12 fibroblasts as depicted in

658 Figure 1A. Comprehensive visualization of viral gene expression on a single cell basis. Each

659 row depicts expression pattern for a different viral gene. Each column depicts expression  
660 within an individual cell. Cells are rank ordered from the cell with the least (left) to the greatest  
661 total viral UMI count (right), with corresponding total viral (filled orange line) and host (black  
662 dots) UMIs per cell depicted in the bottom panel. Cells are further bisected into Virus low cells  
663 (< 500 viral UMIs per cell) and Virus high cells (> 500 viral UMIs per cell) by a thick vertical  
664 black line, from a total of 1605 cells. UMI counts are stratified based on the indicated heatmap  
665 scale. **See also Figure S4.**

666

667 **Figure 6: MHV68-infected cells can be stratified by differential abundance of virus and**  
668 **host RNAs.** scRNA-seq analysis of MHV68-infected LANA+ cells for viral and host RNAs. (A-  
669 E) 3D tSNE-based dimensionality reduction was used to visualize gene expression within  
670 individual cells. (A) K-means clustering identified 5 unique cell clusters, as labelled. (B) Viral  
671 and host RNAs show different patterns of expression, comparing viral immediate early (IE),  
672 early-late (E-L) and late (L) genes with host beta actin (Actb). UMI counts visualized in  
673 individual cells (symbols) as defined by key. (C) The ratio of host Actb to ORF37 UMIs,  
674 calculated for each cell and overlaid onto tSNE-based visualization, varies widely across cells.  
675 (D) Percent of viral (left) and host UMIs (right) per cell was calculated for each cell, portrayed  
676 by shade of color overlaid onto tSNE visualization. (E) Cells were separated into two groups:  
677 virus biased (red) and host biased (black) based on percent viral and host UMIs, and K-means  
678 clustering. Host biased cells included clusters A and B with <20% virus UMIs on a per cell  
679 basis. (F) Characteristics of virus and host biased cells based on scRNA-seq data. (G-H)  
680 Number of (G) viral or (H) host genes with mean UMI expression  $\geq 1$ , among either virus (open  
681 red symbol) or host biased cells (dashed black line). (I) Violin plots depict the distribution of  
682 mean gene expression among expressed genes (mean UMI expression  $\geq 1$ ), comparing viral  
683 genes (left) or host genes (right) in either virus biased (open red symbol) or host biased cells  
684 (open black line). Quartiles and median are depicted in each violin plot. Statistical comparisons

685 compared viral or host genes and their difference between virus and host biased cells.  
686 \*\*\*\* $p < 0.0001$ , one way ANOVA with Tukey's multiple comparisons test. ns, not significant. (J-K)  
687 Biaxial analysis of LANA+ cells (n=1605 cells) comparing total host UMI count (y axis) versus  
688 total viral UMI count (x axis) identified three major cell populations, stratified by differential  
689 expression of viral or host genes. (K) Identification of cells that are Virus<sup>low</sup> Host<sup>high</sup> (blue),  
690 Virus<sup>high</sup> Host<sup>high</sup> (orange), and Virus<sup>high</sup> Host<sup>low</sup> (red). (L-P) Histogram overlays comparing  
691 relative expression of (L-O) viral and (P) host genes for the three identified cell populations.  
692 Each gene is denoted by its IE, E, or L class and by its kinetic class defined by (Cheng et al.,  
693 2012). [See also Figure S5-6, Table S2.](#)

694

695 **Figure 7. Correlation analysis reveals positive and negative correlations in MHV68**  
696 **transcription at the single-cell level.** The inter-relationship of viral gene expression was  
697 interrogated using scRNA-seq data from MHV68-infected LANA+ cells. (A) Correlation matrix  
698 of viral genes among Virus<sup>high</sup> cells (>500 viral UMIs/cell), depicting Spearman correlation  
699 coefficient,  $r_s$ , for each gene pair according to the indicated heatmap. Positive correlation is  
700 indicated by blue, negative correlation indicated by red. Correlation matrix depicts all viral  
701 genes except for M10b and M10c (X indicates gene for which there were no values) and M12,  
702 M13 and M14 (excluded due to negligible values). (B) A comparison of correlation coefficients  
703 between viral gene pairs when analyzing all cells (top), Virus<sup>high</sup> (middle) or Virus<sup>low</sup> (bottom)  
704 cells. Data identify discrepant correlations observed in different cell subsets. (C) Examples of  
705 host and virus gene pairs with positive correlations, demonstrated by plotting scRNA-seq gene  
706 expression values on biaxial plots across all LANA+ cells. (D) Examples of host and virus gene  
707 pairs with a lack of correlation or negative correlation. Panels in C-D depict scRNA-seq values  
708 for all LANA+ cells (n=1,605 cells), including both Virus<sup>high</sup> and Virus<sup>low</sup> events. Each plot  
709 includes the Spearman correlation coefficient for the indicated gene pair defined across all  
710 cells. [See also Figure S7.](#)

## 711 **STAR ★ METHODS**

### 712 **Contact for Reagent and Resource Sharing**

713 Further information and requests for resources and reagents should be directed to, and will be  
714 fulfilled by, the Lead Contact, Linda van Dyk ([Linda.vanDyk@cuanschultz.edu](mailto:Linda.vanDyk@cuanschultz.edu)).

715

### 716 **Experimental Model and Subject Details**

#### 717 Viruses

718 All experiments used WT MHV68 (strain WUMS; ATCC VR-1465) (Virgin et al., 1997), using  
719 either bacterial artificial chromosome–derived WT MHV68 (Adler et al., 2000) or WT  
720 MHV68.LANA $\beta$ lac, which encodes a fusion between ORF73 and the beta-lactamase gene  
721 (Nealy et al., 2010). Certain studies were done using a variant engineered to contain a  
722 translational stop in the ORF72 (v-cyclin) gene, on the WT MHV68.LANA $\beta$ lac background  
723 (Niemeyer et al., 2018). MHV68 was grown and titrated by plaque assay on 3T12 fibroblasts,  
724 as previously published (Diebel et al., 2015).

#### 725 Cell Culture

726 NIH 3T12 cells (ATCC # CCL-164) were grown in Dulbecco's modified Eagle medium (DMEM,  
727 Gibco, Life Technologies) supplemented with 5% fetal bovine serum (Atlanta Biologicals), 1x  
728 Penicillin-Streptomycin-L-Glutamine (Gibco, Life Technologies). Cells were passaged using  
729 0.05% trypsin (Gibco, Life Technologies) after washing with 1x PBS (Gibco, Life  
730 Technologies). Cells were maintained at 37°C in a 5% CO<sub>2</sub> humidified incubator (Forma  
731 Scientific).

732

### 733 **Method Details**

#### 734 RNA sequencing and Analysis

735 3T12 fibroblasts were infected at an MOI=0.5 with a low volume inoculum for one hour, after  
736 which inoculum was removed and cells were rinsed. Cells were harvested at 16 hours post-



737 infection (hpi) and stained with  $\beta$ -lactamase substrate as previously reported (Diebel et al.,  
738 2015) using the CCF2-AM substrate (Invitrogen, Life Technologies). Cells were subjected to  
739 fluorescence activated cell sorting (FACS), with cells gated on singlet cells that were positive  
740 for the cleaved CCF2-AM substrate. Cleavage of CCF2-AM was defined as positive  
741 fluorescence in the violet laser-excited 450nm emission channel obtained in WT  
742 MHV68.LANA $\beta$ lac or cycKO MHV68.LANA $\beta$ lac-infected cultures, compared to parental WT  
743 MHV68 infected cultures with no beta-lactamase fusion gene, used to define background  
744 fluorescence.  $\beta$ -lactamase positive cells were sorted using a FACSAria Fusion (BD  
745 Biosciences). Cells were spun down at 1,200 RPM (Sorvall RT60003), and resuspended in 1x  
746 PBS (Gibco, Life Technologies). Cells were either prepared for CyTOF or RNA-sequencing by  
747 the Genomics and Microarray Shared Resource Core at University of Colorado. Bulk RNA-seq  
748 libraries were sequenced using Illumina HiSeq4000 platform with single-end reads (1  $\times$  151),  
749 with forty million reads per sample collected and resulting sequences filtered and trimmed to  
750 remove low-quality bases (Phred score <15), and analyzed using a custom computational  
751 pipeline consisting of open-source gSNAP, Cufflinks. Single cell RNA Sequencing (scRNA-  
752 seq) (1000 cells per sample) was submitted for single cell barcoding and cDNA synthesis on a  
753 10x Genomics Chromium Controller (10x Genomics), with recovered cell number and  
754 sequencing depth for scRNA-seq described in Figure S3. cDNA was sequenced using the  
755 NovaSEQ 6000 instrument with an S4 Flow Cell (Illumina). Sequence data was analyzed as  
756 follows: Cellranger (2.0.2) count module was used for alignment, filtering, barcode counting  
757 and UMI counting of the single cell FASTQs. tSNE coordinates were determined by  
758 CellRanger.

759

#### 760 PrimeFlow RNA Assay

761 3T12 fibroblasts were infected at an MOI=1.0 with a small-volume inoculation. Inoculum was  
762 removed and rinsed-off with PBS after one hour and growth medium was replaced. Cells were

763 harvested 16 hpi and processed for flow cytometry using the PrimeFlow RNA Assay (Thermo  
764 Fisher) as described previously (Oko et al., 2019). Briefly, cells were stained with a rabbit  
765 antibody against the MHV68 ORF4 protein (vRCA), labeled with a Zenon R-phycoerythrin  
766 rabbit IgG label reagent (Life Technologies) per manufacturer's protocol (Oko et al., 2019).  
767 Following cell fixation, cells were then subjected to fluorescent barcoding, labeling distinct  
768 experimental conditions with either Ghost Dye Violet 450 (Tonbo Biosciences), Ghost Dye  
769 Violet 510 (Tonbo Biosciences) or leaving the cells unlabeled. Labelled samples were then  
770 combined into a single tube and subjected to probe hybridization for viral and host RNAs or  
771 proteins following the manufacturer's protocol. Flow cytometric analysis was done on an LSR II  
772 instrument (BD Biosciences). Compensation values were initially based on antibody-stained  
773 beads (BD Biosciences) and cross-validated using cell samples stained with individual  
774 antibody conjugates, with compensation modified as needed post-collection using FlowJo.  
775 PrimeFlow probes and antibodies included: i) a type 6 (AlexaFluor750)-mouse actb probe, ii) a  
776 type 4 (AF488)-MHV68 ORF18 probe, iii) PE-labelled anti-vRCA antibody, and iv) AF647-  
777 conjugated anti-mouse phospho-histone H2AX antibody (clone JBW301, that recognizes  
778 phosphorylated serine 139 of H2AX).

779

#### 780 CyTOF Sample Preparation and Data Acquisition

781 CyTOF antibodies were obtained from Fluidigm (previously DVS Sciences), provided by the  
782 University of Colorado CyTOF Antibody Bank, supported by the Flow Cytometry Shared  
783 Resource and the Human Immune Monitoring Shared Resource of the University of Colorado  
784 Cancer Center. Samples were FACS purified based on LANA:: $\beta$ -lactamase dependent CCF2-  
785 AM cleavage, into either LANA $\beta$ lac<sup>+</sup> or LANA $\beta$ lac<sup>-</sup> fractions, transferred to 5mL screw cap  
786 tubes, spun down, and stained for viability using 5  $\mu$ M Cell-ID Cisplatin (Fluidigm) diluted in 1X  
787 PBS (Rockland Immunochemicals) for 5 minutes at RT. Samples were then washed, fixed, and  
788 each sample labelled with a series of unique palladium isotopic barcodes (Cell-ID 20-Plex

789 Palladium (Pd) Barcoding Kit, Fluidigm). After samples were washed and pooled, cells were  
790 pre-treated with 2.4G2 Fc receptor blockade (Tonbo) using a 1:100 dilution of antibody. Cells  
791 were incubated with a panel of antibodies, diluted in Maxpar Cell Staining Buffer (Fluidigm), to  
792 detect cell surface proteins, washed, then incubated with secondary detection antibodies (anti-  
793 FITC, anti-PE, anti-APC, anti-Biotin, and goat anti-rabbit isotopically labelled antibodies)  
794 (Kimball et al., 2019). Samples were washed, fixed, and permeabilized (eBioscience Foxp3 /  
795 Transcription Factor Staining Buffer Set, Thermo Fisher) before incubation with antibodies to  
796 intracellular proteins. The sample was washed, fixed with freshly made 1.6%  
797 paraformaldehyde diluted in Maxpar PBS (16% paraformaldehyde, Alfa Aesar), incubated in  
798 0.125nM Iridium intercalator diluted in Maxpar PBS (Fluidigm), and stored at 4°C until  
799 acquisition. Samples were washed with 3ml of Maxpar Cell Staining Buffer, washed two times  
800 with deionized water (Milli-Q®), resuspended in deionized water (Milli-Q) containing 1:9 EQ  
801 Four Element Calibration Beads (Fluidigm), filtered through CellTrics 30um disposable filters  
802 (Sysmex-Partec), and counted with a BIORAD TC20 automated cell counter. Data was  
803 acquired on the Helios mass cytometer (Fluidigm). To ensure an appropriate flow rate though  
804 the Helios, the sample volume was adjusted with the EQ Four Element Calibration Beads  
805 (Fluidigm)/deionized water (Milli-Q) to dilute the sample to 1 million cells/mL at an acquired  
806 event rate of 400,000-500,000 events/hr.

807

#### 808 CyTOF sample normalization/debarcoding

809 Data were normalized with bead-based normalization using NormalizerR2013b\_MacOSX and  
810 then debarcoded using SingleCellDebarcoderR2013b\_MacOSX, using software downloaded  
811 from the Nolan laboratory GitHub page (<https://github.com/nolanlab>). Normalized and  
812 debarcoded data were subjected to traditional Boolean gating in FlowJo, identifying DNA+  
813 events (<sup>191</sup>Iridium (Ir)+ <sup>193</sup> Ir+) that were viable (<sup>195</sup>Platinum(Pt)-), exported for downstream  
814 analysis in PhenoGraph.

815

## 816 CyTOF Data Analysis

817 Normalized and debarcoded live DNA+ events were imported into cytofkit, and subjected to the  
818 PhenoGraph algorithm. Clustering was done on either 9 cell surface proteins (Figures 1-2) or  
819 all 23 proteins (Figure S1) . PhenoGraph was run with the following settings: 1) Merge method:  
820 “min” (Figures 1, S1) or “ceiling: 10,000 events” (Fig. 2), 2) Transformation method:  
821 “cytofAsinh”, 3) Clustering method: “Rphenograph”, and 4) Visualization method: “tSNE”. All  
822 other settings were selected by default. Median marker intensity for mock, LANA-, and LANA+  
823 samples was calculated in FlowJo. Statistical significance was tested in GraphPad Prism  
824 using an unpaired t test, with statistical significance as identified.

825

## 826 PhenoGraph visualization and analysis

827 PhenoGraph tSNE plots were visualized and customized in the R package “Shiny” (Kimball et  
828 al., 2018). In the “Shiny” application cluster color was customized, tSNE plots were colored  
829 according to the expression of various cellular markers, and dendrograms were generated.  
830 The “cluster cell percentage” .csv file was used for comparing the distribution of events  
831 between conditions and determining statistical significance.

832

## 833 RT-qPCR

834 RNA was isolated using the RNeasy Micro Kit (Qiagen) following manufacturer’s  
835 specifications. DNA contamination was removed using Turbo-DNAse (ThermoFisher)  
836 according to the manufacturer’s specifications. RT-qPCR for Ifnb1 was performed using a  
837 primer/probe set (ThermoFisher) and the LightCycler 480 Probes Master (Roche) in 384-well  
838 plates on the QuantStudio 7 Flex Instrument (Applied Biosystems, Life Technologies). RNA  
839 was reverse transcribed with SuperScript II (Invitrogen) and qPCR was performed using iQ  
840 SYBR Green SuperMix (Bio-Rad) in 384-well plates on the QuantStudio 7 Flex instrument

841 (Applied Biosystems, Life Technologies). qRT-PCR results were analyzed using the Pfaffl  
842 method, as described by (Pfaffl, 2001), with standardization relative to 18S.

843

#### 844 Quantification and Statistical Analysis

845 Data from the 10X Genomics Chromium Controller (10x Genomics) were analyzed with  
846 Cell Ranger, including calculation of cell coordinates for 3D tSNE plots, visualized in Plotly.  
847 Unbiased K means clustering was carried out using the DoKmeans function in Seurat. SeqGeq  
848 was used for biaxial plotting of scRNAseq data. All flow cytometry data analysis was performed  
849 using FlowJo V.10.0.8r1 with flow cytometry data shown as dot plots or averaged for bar  
850 graphs. Statistical significance was tested using unpaired student's t test or one-way ANOVA  
851 analysis with Tukey's multiple comparisons test. Statistical analysis and graphing were  
852 performed with GraphPad Prism 7.0d or higher. Gene expression correlation was determined  
853 with Spearman's correlation analysis in GraphPad Prism (8.4.2). CyTOF analysis was done  
854 using PhenoGraph as described above or in (Kimball et al., 2018). p values less than 0.05  
855 were considered significant.

856

#### 857 **Data and Software Availability**

858 CyTOF data have been deposited to FlowRepository.org and will be made publicly available  
859 upon manuscript acceptance. RNA-Seq data have been deposited to NCBI GEO and will be  
860 made publicly available upon manuscript acceptance.

## Key Resources Table

| REAGENT or RESOURCE                                      | SOURCE   | IDENTIFIER                          |
|----------------------------------------------------------|----------|-------------------------------------|
| Antibodies                                               |          |                                     |
| Anti-beta-Catenin (clone D13A1) – 165Ho                  | Fluidigm | Cat#: 3165027A, RRID:<br>AB_2811247 |
| Anti-Human/Mouse CD44 (clone IM7) – 171Yb                | Fluidigm | Cat#: 3171003B                      |
| Anti-IkBa (amino-terminal antigen) (clone L35A5) – 164Dy | Fluidigm | Cat#: 3164004A, RRID:<br>AB_2811249 |
| Anti-Ki67 (clone B56) – 161Dy                            | Fluidigm | Cat#: 3161007B, RRID:<br>AB_2811255 |
| Anti-Mouse Ly-6A/E (Sca-1) (clone D7) – 169Tm            | Fluidigm | Cat#: 3169015B, RRID:<br>AB_2811233 |
| Anti-Mouse Ly-6C (clone HK1.4) – 162Dy                   | Fluidigm | Cat#: 3162014B                      |
| Anti-Mouse MHC Class I (clone 28-14-8) – 144Nd           | Fluidigm | Cat#: 3144016B, RRID:<br>AB_2687831 |
| Anti-Human cleaved PARP (clone F21-852) – 143Nd          | Fluidigm | Cat#: 3143011A                      |
| Anti-p-p38 [T180/Y182] (clone D3F9) – 156Gd              | Fluidigm | Cat#: 3156002A, RRID:<br>AB_2661826 |
| Anti-p4E-BP1 [T37/T46] (clone 236B4) – 149Sm             | Fluidigm | Cat#: 3149005A, RRID:<br>AB_2847866 |
| Anti-pAkt [S473] (clone D9E) – 152Sm                     | Fluidigm | Cat#: 3152005A, RRID:<br>AB_2811246 |
| Anti-pERK 1/2 [T202/Y204] (clone D1314.4E) – 167Er       | Fluidigm | Cat#: 3167005A, RRID:<br>AB_2661834 |

|                                                     |           |                                     |
|-----------------------------------------------------|-----------|-------------------------------------|
| Anti-pHistone H2A.X [Ser139] (clone JBW301) - 147Sm | Fluidigm  | Cat#: 3147016A, RRID:<br>AB_2847865 |
| Anti-pRb [S807/811] (clone J112-906) – 150Nd        | Fluidigm  | Cat#: 3150013A, RRID:<br>AB_2811254 |
| Anti-pS6 [S235/S236] (clone N7-548) –172Yb          | Fluidigm  | Cat#: 3172008A, RRID:<br>AB_2811251 |
| Anti-pSHP2 [Y580] (clone D66F10) – 141Pr            | Fluidigm  | Cat#: 3141002A, RRID:<br>AB_2811252 |
| Anti-pStat1 [Y701] (clone 58D6) – 153Eu             | Fluidigm  | Cat#: 3153003A, RRID:<br>AB_2661824 |
| Anti-pStat3 [Y705] (clone 4/P-Stat3) – 158Gd        | Fluidigm  | Cat#: 3158005A, RRID:<br>AB_2661827 |
| Anti-APC (clone APC003) – 176Yb                     | Fluidigm  | Cat#: 3176007B, RRID:<br>AB_2811236 |
| Anti-Biotin (clone 1D4-C5) – 170Er                  | Fluidigm  | Cat#: 3170003B, RRID:<br>AB_2811234 |
| Anti-FITC (clone FIT-22) – 160Gd                    | Fluidigm  | Cat#: 3160011B, RRID:<br>AB_2811235 |
| Anti-PE (clone PE-001) – 145Nd                      | Fluidigm  | Cat#: 3145006B, RRID:<br>AB_2687631 |
| APC anti-mouse CD137 (Bst2, PDCA-1) (clone 927)     | BioLegend | Cat#: 127015, RRID:<br>AB_1967101   |
| Biotin anti-mouse/rat CD29 (clone HM $\beta$ 1-1)   | BioLegend | Cat#: 102203, RRID:<br>AB_312880    |

|                                                                                |                                        |                                              |
|--------------------------------------------------------------------------------|----------------------------------------|----------------------------------------------|
| FITC anti-mouse CD9 (clone MZ3)                                                | BioLegend                              | Cat#: 124807, RRID:<br>AB_1279324            |
| Goat Anti-Rabbit (polyclonal) – 175Lu                                          | Fluidigm                               | Cat#: 3175002G                               |
| PE anti-mouse CD63 (clone NVG-2)                                               | BioLegend                              | Cat#: 143903, RRID:<br>AB_11203532           |
| Purified Anti-Mouse CD16/CD32 (clone 2.4G2)                                    | Tonbo                                  | Cat#: 70-0161-U500, RRID:<br>AB_2621487      |
| vRCA Ab (goat polyclonal antiserum)                                            | Dr. H.W. Virgin<br>IV                  | Laboratory generated<br>polyclonal antiserum |
| Alexa Fluor 647-conjugated anti-phospho<br>Histone H2A.X [S139] (clone JBW301) | MilliporeSigma                         | Cat#: 05-636-AF647                           |
| <b>Chemicals, Peptides, and Recombinant Proteins</b>                           |                                        |                                              |
| Paraformaldehyde (PFA), 16% w/v aqueous<br>solution, methanol free             | Alfa Aesar by<br>Thermo Fischer        | Cat#: 43368                                  |
| 1x PBS                                                                         | Gibco, Rockland<br>Immunochemica<br>ls | Cat#: 10010-023                              |
| Barcoding Perm Buffer (10X)                                                    | Fluidigm                               | Cat#: 201057                                 |
| Cell-ID™ 20-Plex Pd Barcoding Set                                              | Fluidigm                               | Cat#: PN S00114                              |
| Cell-ID™ Cisplatin                                                             | Fluidigm                               | Cat#: 201064                                 |
| Cell-ID™ Intercalator-Ir                                                       | Fluidigm                               | Cat#: 201192B                                |
| Water, deionized distilled                                                     | Millipore                              | Cat#: EM3234                                 |
| DMEM, high glucose                                                             | Gibco, Life<br>Technologies            | Cat#: 11965-118                              |



|                                                                                            |                             |                   |
|--------------------------------------------------------------------------------------------|-----------------------------|-------------------|
| eBioscience™ Fcγ3 / Transcription Factor Fixation/Permeabilization Concentrate and Diluent | Invitrogen by Thermo Fisher | Cat#: 00-5523-00  |
| EQ™ Four Element Calibration Beads                                                         | Fluidigm                    | Cat#: 201078      |
| Fetal Bovine Serum                                                                         | Atlanta Biologicals         | Cat#: S11550      |
| iQ SYBR Green Supermix                                                                     | Bio-Rad                     | Cat#: 170-8882    |
| Lightcycler 480 Probes Master                                                              | Roche Molecular Systems     | Ref#: 04707494001 |
| Maxpar Cell Staining Buffer                                                                | Fluidigm                    | Cat#: 201068      |
| Maxpar Fix I Buffer (5X)                                                                   | Fluidigm                    | Cat#: S00115      |
| Maxpar PBS                                                                                 | Fluidigm                    | Cat#: 201058      |
| Penicillin-Streptomycin-Glutamate (100x)                                                   | Gibco, Life Technologies    | Cat#: 10378016    |
| Poly(I:C) HMW                                                                              | Invivogen                   | Cat#: tlrl-pic    |
| Proteinase K                                                                               | Promega                     | Cat#: V3021       |
| Sodium Chloride                                                                            | ThermoFisher                | Cat#: BP-358-212  |
| SuperScript II Reverse Transcriptase                                                       | Invitrogen, Thermo Fisher   | Cat#: 18064014    |
| Trypsin-EDTA (0.05%), phenol red                                                           | Gibco, Thermo Fisher        | Cat#: 25300-054   |
| TURBO DNase (2 U/μL)                                                                       | ThermoFisher                | Cat#: AM2238      |
| X-tremeGENE HP DNA transfection reagent                                                    | Sigma-Aldrich               | Cat#: 6366236001  |
| <b>Critical Commercial Assays</b>                                                          |                             |                   |

|                                                                                                    |                                 |                         |
|----------------------------------------------------------------------------------------------------|---------------------------------|-------------------------|
| DNeasy Blood and Tissue Kit                                                                        | Qiagen                          | Cat#: 69506             |
| LiveBLazer FRET-B/G Loading Kit with CCF2-AM                                                       | Life Technologies, ThermoFisher | Cat#: K1032             |
| OneStep RT-PCR Kit                                                                                 | Qiagen                          | Cat#: 210212            |
| PrimeFlow™ RNA Assay Kit                                                                           | ThermoFisher                    | Cat#: 88-18005-210      |
| RNeasy Micro Kit                                                                                   | Qiagen                          | Cat#: 74004             |
| Zenon™ R-Phycoerythrin Rabbit IgG Labeling Kit                                                     | Invitrogen, ThermoFisher        | Cat#: Z25355            |
| <b>Deposited Data</b>                                                                              |                                 |                         |
| Raw CyTOF data                                                                                     | This study                      | FlowRepository.org      |
| Raw single cell RNAseq data                                                                        | This study                      | GEO                     |
| <b>Experimental Models: Cell Lines</b>                                                             |                                 |                         |
| Murine 3T12 fibroblasts (BALB/3T12-3)                                                              | ATCC                            | ATCC CCL-164™           |
| <b>Experimental Models: Organisms/Strains</b>                                                      |                                 |                         |
| Murine gammaherpesvirus 68 (Wild-type, WT MHV68)                                                   | L.F. van Dyk                    | (Virgin et al., 1997)   |
| Murine gammaherpesvirus 68 with a LANA::βlac gene fusion (WT MHV68.blac)                           | L.F. van Dyk                    | (Nealy et al., 2010)    |
| Murine gammaherpesvirus 68 cyclin-deficient virus with a LANA::βlac gene fusion (CycKO MHV68.blac) | L.F. van Dyk                    | (Niemeyer et al., 2018) |
| <b>Oligonucleotides</b>                                                                            |                                 |                         |
| MHV68 ORF18 probe, Type 4 (AlexaFluor 488)                                                         | Thermo Fisher                   | VF4-60000512            |

|                                                               |               |                                                                                                                                                 |
|---------------------------------------------------------------|---------------|-------------------------------------------------------------------------------------------------------------------------------------------------|
| Mouse Actb probe, Type 6 (AlexaFuor750)                       | Thermo Fisher | VB6-12823                                                                                                                                       |
| Mouse 18S primer/probe set                                    | Thermo Fisher | Cat#: Mm03928990_g1                                                                                                                             |
| Mouse 18S Quantitect Primer Assay                             | Qiagen        | Cat#: QT00199367                                                                                                                                |
| Mouse Ifnb1 primer/probe set                                  | Thermo Fisher | Cat#: Mm00439552_s1                                                                                                                             |
| <b>Software and Algorithms</b>                                |               |                                                                                                                                                 |
| Adobe Illustrator 24.1.3                                      | Adobe         | <a href="http://www.adobe.com/illustrator">www.adobe.com/illustrator</a>                                                                        |
| Bead Normalization<br>(NormalizerR2013b_MacOSX)               | Github        | <a href="https://github.com/nolanlab/bead-normalization">https://github.com/nolanlab/bead-normalization</a>                                     |
| Cell Ranger                                                   | 10x Genomics  | <a href="https://www.10xgenomics.com">https://www.10xgenomics.com</a>                                                                           |
| Cytofkit v3.8                                                 | Bioconductor  | <a href="http://bioconductor.org/packages/release/bioc/html/cytofkit.html">http://bioconductor.org/packages/release/bioc/html/cytofkit.html</a> |
| FlowJo v10.4.2 and v10.6.1                                    | FlowJo        | <a href="https://www.flowjo.com">https://www.flowjo.com</a>                                                                                     |
| GraphPad Prism 7.0 and 8.0                                    | GraphPad      | <a href="https://www.graphpad.com">https://www.graphpad.com</a>                                                                                 |
| Matlab                                                        | MathWorks     | <a href="https://www.mathworks.com/products/matlab.html">https://www.mathworks.com/products/matlab.html</a>                                     |
| Microsoft Excel 15.28                                         | Microsoft     | <a href="http://www.microsoft.com">www.microsoft.com</a>                                                                                        |
| Microsoft Office 15.28                                        | Microsoft     | <a href="http://www.microsoft.com">www.microsoft.com</a>                                                                                        |
| R studio v1.1.453                                             | R studio      | <a href="https://www.rstudio.com/">https://www.rstudio.com/</a>                                                                                 |
| SeqGeq 1.6.0                                                  | FlowJo        | <a href="https://www.flowjo.com">https://www.flowjo.com</a>                                                                                     |
| Seurat                                                        | Satija lab    | <a href="https://www.satijalab.org/seurat">https://www.satijalab.org/seurat</a>                                                                 |
| Single Cell Debarcoder<br>(SingleCellDebarcoderR2013b_MacOSX) | Github        | <a href="https://github.com/nolanlab/single-cell-debarcoder">https://github.com/nolanlab/single-cell-debarcoder</a>                             |
| XQuartz v2.7.11                                               | XQuartz       | <a href="https://www.xquartz.org">https://www.xquartz.org</a>                                                                                   |

863

## REFERENCES

864

865 Adang, L.A., Parsons, C.H., and Kedes, D.H. (2006). Asynchronous progression through the  
866 lytic cascade and variations in intracellular viral loads revealed by high-throughput single-cell  
867 analysis of Kaposi's sarcoma-associated herpesvirus infection. *J Virol.* 80(20), 10073-10082.  
868 Published online 2006/09/29 DOI: 10.1128/JVI.01156-06.

869 Adler, H., Messerle, M., Wagner, M., and Koszinowski, U.H. (2000). Cloning and mutagenesis  
870 of the murine gammaherpesvirus 68 genome as an infectious bacterial artificial chromosome. *J*  
871 *Virol.* 74(15), 6964-6974. Published online 2000/07/11.

872 Ahn, J.W., Powell, K.L., Kellam, P., and Alber, D.G. (2002). Gammaherpesvirus lytic gene  
873 expression as characterized by DNA array. *J Virol.* 76(12), 6244-6256. Published online  
874 2002/05/22 DOI: 10.1128/jvi.76.12.6244-6256.2002.

875 Avraham, R., Haseley, N., Brown, D., Penaranda, C., Jijon, H.B., Trombetta, J.J., Satija, R.,  
876 Shalek, A.K., Xavier, R.J., Regev, A., et al. (2015). Pathogen Cell-to-Cell Variability Drives  
877 Heterogeneity in Host Immune Responses. *Cell.* 162(6), 1309-1321. Published online  
878 2015/09/08 DOI: 10.1016/j.cell.2015.08.027.

879 Barton, E., Mandal, P., and Speck, S.H. (2011). Pathogenesis and host control of  
880 gammaherpesviruses: lessons from the mouse. *Annu Rev Immunol.* 29, 351-397. Published  
881 online 2011/01/12 DOI: 10.1146/annurev-immunol-072710-081639.

882 Bhatt, A.P., Wong, J.P., Weinberg, M.S., Host, K.M., Giffin, L.C., Buijnink, J., van Dijk, E.,  
883 Izumiya, Y., Kung, H.J., Temple, B.R., et al. (2016). A viral kinase mimics S6 kinase to  
884 enhance cell proliferation. *Proc Natl Acad Sci U S A.* 113(28), 7876-7881. Published online  
885 2016/06/28 DOI: 10.1073/pnas.1600587113.

886 Cesarman, E. (2014). Gammaherpesviruses and lymphoproliferative disorders. *Annu Rev*  
887 *Pathol.* 9, 349-372. Published online 2013/10/12 DOI: 10.1146/annurev-pathol-012513-  
888 104656.

889 Chang, P.C., Campbell, M., and Robertson, E.S. (2016). Human Oncogenic Herpesvirus and  
890 Post-translational Modifications - Phosphorylation and SUMOylation. *Front Microbiol.* 7, 962.  
891 Published online 2016/07/06 DOI: 10.3389/fmicb.2016.00962.

892 Chaturvedi, S., Klein, J., Vardi, N., Bolovan-Fritts, C., Wolf, M., Du, K., Mlera, L., Calvert, M.,  
893 Moorman, N.J., Goodrum, F., et al. (2020). A Molecular Mechanism for Probabilistic Bet-  
894 hedging and its Role in Viral Latency. *bioRxiv.* DOI:  
895 <https://doi.org/10.1101/2020.05.14.096560>.

896 Cheng, B.Y., Zhi, J., Santana, A., Khan, S., Salinas, E., Forrest, J.C., Zheng, Y., Jaggi, S.,  
897 Leatherwood, J., and Krug, L.T. (2012). Tiled microarray identification of novel viral transcript  
898 structures and distinct transcriptional profiles during two modes of productive murine  
899 gammaherpesvirus 68 infection. *J Virol.* 86(8), 4340-4357. Published online 2012/02/10 DOI:  
900 10.1128/JVI.05892-11.

901 Coleman, H.M., Efsthathiou, S., and Stevenson, P.G. (2005). Transcription of the murine  
902 gammaherpesvirus 68 ORF73 from promoters in the viral terminal repeats. *J Gen Virol.* 86(Pt  
903 3), 561-574. Published online 2005/02/22 DOI: 10.1099/vir.0.80565-0.

- 904 Covarrubias, S., Gaglia, M.M., Kumar, G.R., Wong, W., Jackson, A.O., and Glaunsinger, B.A.  
905 (2011). Coordinated destruction of cellular messages in translation complexes by the  
906 gammaherpesvirus host shutoff factor and the mammalian exonuclease Xrn1. *PLoS Pathog.*  
907 7(10), e1002339. Published online 2011/11/03 DOI: 10.1371/journal.ppat.1002339.
- 908 Covarrubias, S., Richner, J.M., Clyde, K., Lee, Y.J., and Glaunsinger, B.A. (2009). Host shutoff  
909 is a conserved phenotype of gammaherpesvirus infection and is orchestrated exclusively from  
910 the cytoplasm. *J Virol.* 83(18), 9554-9566. Published online 2009/07/10 DOI:  
911 10.1128/JVI.01051-09.
- 912 Damania, B., Jeong, J.H., Bowser, B.S., DeWire, S.M., Staudt, M.R., and Dittmer, D.P. (2004).  
913 Comparison of the Rta/Orf50 transactivator proteins of gamma-2-herpesviruses. *J Virol.*  
914 78(10), 5491-5499. Published online 2004/04/29 DOI: 10.1128/jvi.78.10.5491-5499.2004.
- 915 Diebel, K.W., Oko, L.M., Medina, E.M., Niemeyer, B.F., Warren, C.J., Claypool, D.J., Tibbetts,  
916 S.A., Cool, C.D., Clambey, E.T., and van Dyk, L.F. (2015). Gammaherpesvirus small  
917 noncoding RNAs are bifunctional elements that regulate infection and contribute to virulence in  
918 vivo. *mBio.* 6(1), e01670-01614. Published online 2015/02/19 DOI: 10.1128/mBio.01670-14.
- 919 Dong, S., Forrest, J.C., and Liang, X. (2017). Murine Gammaherpesvirus 68: A Small Animal  
920 Model for Gammaherpesvirus-Associated Diseases. *Adv Exp Med Biol.* 1018, 225-236.  
921 Published online 2017/10/21 DOI: 10.1007/978-981-10-5765-6\_14.
- 922 Drayman, N., Patel, P., Vistain, L., and Tay, S. (2019). HSV-1 single-cell analysis reveals the  
923 activation of anti-viral and developmental programs in distinct sub-populations. *Elife.* 8.  
924 Published online 2019/05/16 DOI: 10.7554/eLife.46339.
- 925 Ebrahimi, B., Dutia, B.M., Roberts, K.L., Garcia-Ramirez, J.J., Dickinson, P., Stewart, J.P.,  
926 Ghazal, P., Roy, D.J., and Nash, A.A. (2003). Transcriptome profile of murine  
927 gammaherpesvirus-68 lytic infection. *J Gen Virol.* 84(Pt 1), 99-109. Published online  
928 2003/01/21 DOI: 10.1099/vir.0.18639-0.
- 929 Forrest, J.C., and Speck, S.H. (2008). Establishment of B-cell lines latently infected with  
930 reactivation-competent murine gammaherpesvirus 68 provides evidence for viral alteration of a  
931 DNA damage-signaling cascade. *J Virol.* 82(15), 7688-7699. Published online 2008/05/23 DOI:  
932 10.1128/JVI.02689-07.
- 933 Glaunsinger, B.A. (2015). Modulation of the Translational Landscape During Herpesvirus  
934 Infection. *Annu Rev Virol.* 2(1), 311-333. Published online 2016/03/10 DOI: 10.1146/annurev-  
935 virology-100114-054839.
- 936 Gong, D., Dai, X., Xiao, Y., Du, Y., Chapa, T.J., Johnson, J.R., Li, X., Krogan, N.J., Deng, H.,  
937 Wu, T.T., et al. (2017). Virus-Like Vesicles of Kaposi's Sarcoma-Associated Herpesvirus  
938 Activate Lytic Replication by Triggering Differentiation Signaling. *J Virol.* 91(15). Published  
939 online 2017/05/19 DOI: 10.1128/JVI.00362-17.
- 940 Guenet, J.L. (2005). The mouse genome. *Genome Res.* 15(12), 1729-1740. Published online  
941 2005/12/13 DOI: 10.1101/gr.3728305.
- 942 Hair, J.R., Lyons, P.A., Smith, K.G., and Efstathiou, S. (2007). Control of Rta expression  
943 critically determines transcription of viral and cellular genes following gammaherpesvirus  
944 infection. *J Gen Virol.* 88(Pt 6), 1689-1697. Published online 2007/05/09 DOI:  
945 10.1099/vir.0.82548-0.

- 946 Hansen, M.M.K., Desai, R.V., Simpson, M.L., and Weinberger, L.S. (2018). Cytoplasmic  
947 Amplification of Transcriptional Noise Generates Substantial Cell-to-Cell Variability. *Cell Syst.*  
948 7(4), 384-397 e386. Published online 2018/09/24 DOI: 10.1016/j.cels.2018.08.002.
- 949 Hartenian, E., Gilbertson, S., Federspiel, J.D., Cristea, I.M., and Glaunsinger, B.A. (2020).  
950 RNA decay during gammaherpesvirus infection reduces RNA polymerase II occupancy of host  
951 promoters but spares viral promoters. *PLoS Pathog.* 16(2), e1008269. Published online  
952 2020/02/08 DOI: 10.1371/journal.ppat.1008269.
- 953 Hartenian, E., and Glaunsinger, B.A. (2019). Feedback to the central dogma: cytoplasmic  
954 mRNA decay and transcription are interdependent processes. *Crit Rev Biochem Mol Biol.*  
955 54(4), 385-398. Published online 2019/10/28 DOI: 10.1080/10409238.2019.1679083.
- 956 Hill, E.R., Koganti, S., Zhi, J., Megyola, C., Freeman, A.F., Palendira, U., Tangye, S.G., Farrell,  
957 P.J., and Bhaduri-McIntosh, S. (2013). Signal transducer and activator of transcription 3 limits  
958 Epstein-Barr virus lytic activation in B lymphocytes. *J Virol.* 87(21), 11438-11446. Published  
959 online 2013/08/24 DOI: 10.1128/JVI.01762-13.
- 960 Jang, G.H., Lee, J., Kim, N.Y., Kim, J.H., Yeh, J.Y., Han, M., Ahn, S.K., Kang, H., and Lee, M.  
961 (2016). Suppression of lytic replication of Kaposi's sarcoma-associated herpesvirus by  
962 autophagy during initial infection in NIH 3T3 fibroblasts. *Arch Virol.* 161(3), 595-604. Published  
963 online 2015/12/02 DOI: 10.1007/s00705-015-2698-2.
- 964 Johnson, L.S., Willert, E.K., and Virgin, H.W. (2010). Redefining the genetics of murine  
965 gammaherpesvirus 68 via transcriptome-based annotation. *Cell Host Microbe.* 7(6), 516-526.  
966 Published online 2010/06/15 DOI: 10.1016/j.chom.2010.05.005.
- 967 Kapadia, S.B., Molina, H., van Berkel, V., Speck, S.H., and Virgin, H.W.t. (1999). Murine  
968 gammaherpesvirus 68 encodes a functional regulator of complement activation. *J Virol.* 73(9),  
969 7658-7670. Published online 1999/08/10.
- 970 Kimball, A.K., Oko, L.M., Bullock, B.L., Nemenoff, R.A., van Dyk, L.F., and Clambey, E.T.  
971 (2018). A Beginner's Guide to Analyzing and Visualizing Mass Cytometry Data. *J Immunol.*  
972 200(1), 3-22. Published online 2017/12/20 DOI: 10.4049/jimmunol.1701494.
- 973 Kimball, A.K., Oko, L.M., Kaspar, R.E., van Dyk, L.F., and Clambey, E.T. (2019). High-  
974 Dimensional Characterization of IL-10 Production and IL-10-Dependent Regulation during  
975 Primary Gammaherpesvirus Infection. *Immunohorizons.* 3(3), 94-109. Published online  
976 2019/07/30 DOI: 10.4049/immunohorizons.1800088.
- 977 Klasse, P.J. (2015). Molecular determinants of the ratio of inert to infectious virus particles.  
978 *Prog Mol Biol Transl Sci.* 129, 285-326. Published online 2015/01/18 DOI:  
979 10.1016/bs.pmbts.2014.10.012.
- 980 Krishnan, H.H., Naranatt, P.P., Smith, M.S., Zeng, L., Bloomer, C., and Chandran, B. (2004).  
981 Concurrent expression of latent and a limited number of lytic genes with immune modulation  
982 and antiapoptotic function by Kaposi's sarcoma-associated herpesvirus early during infection  
983 of primary endothelial and fibroblast cells and subsequent decline of lytic gene expression. *J*  
984 *Virol.* 78(7), 3601-3620. Published online 2004/03/16 DOI: 10.1128/jvi.78.7.3601-3620.2004.
- 985 Lee, H.R., Amatya, R., and Jung, J.U. (2015). Multi-step regulation of innate immune signaling  
986 by Kaposi's sarcoma-associated herpesvirus. *Virus Res.* 209, 39-44. Published online  
987 2015/03/23 DOI: 10.1016/j.virusres.2015.03.004.

- 988 Levine, J.H., Simonds, E.F., Bendall, S.C., Davis, K.L., Amir el, A.D., Tadmor, M.D., Litvin, O.,  
989 Fienberg, H.G., Jager, A., Zunder, E.R., et al. (2015). Data-Driven Phenotypic Dissection of  
990 AML Reveals Progenitor-like Cells that Correlate with Prognosis. *Cell*. 162(1), 184-197.  
991 Published online 2015/06/23 DOI: 10.1016/j.cell.2015.05.047.
- 992 Ma, S.D., Hegde, S., Young, K.H., Sullivan, R., Rajesh, D., Zhou, Y., Jankowska-Gan, E.,  
993 Burlingham, W.J., Sun, X., Gulley, M.L., et al. (2011). A new model of Epstein-Barr virus  
994 infection reveals an important role for early lytic viral protein expression in the development of  
995 lymphomas. *J Virol*. 85(1), 165-177. Published online 2010/10/29 DOI: 10.1128/JVI.01512-10.
- 996 Martinez-Guzman, D., Rickabaugh, T., Wu, T.T., Brown, H., Cole, S., Song, M.J., Tong, L.,  
997 and Sun, R. (2003). Transcription program of murine gammaherpesvirus 68. *J Virol*. 77(19),  
998 10488-10503. Published online 2003/09/13 DOI: 10.1128/jvi.77.19.10488-10503.2003.
- 999 Matthews, N.C., Goodier, M.R., Robey, R.C., Bower, M., and Gotch, F.M. (2011). Killing of  
1000 Kaposi's sarcoma-associated herpesvirus-infected fibroblasts during latent infection by  
1001 activated natural killer cells. *Eur J Immunol*. 41(7), 1958-1968. Published online 2011/04/22  
1002 DOI: 10.1002/eji.201040661.
- 1003 Messinger, J.E., Dai, J., Stanland, L.J., Price, A.M., and Luftig, M.A. (2019). Identification of  
1004 Host Biomarkers of Epstein-Barr Virus Latency IIb and Latency III. *mBio*. 10(4). Published  
1005 online 2019/07/04 DOI: 10.1128/mBio.01006-19.
- 1006 Nawandar, D.M., Wang, A., Makielski, K., Lee, D., Ma, S., Barlow, E., Reusch, J., Jiang, R.,  
1007 Wille, C.K., Greenspan, D., et al. (2015). Differentiation-Dependent KLF4 Expression  
1008 Promotes Lytic Epstein-Barr Virus Infection in Epithelial Cells. *PLoS Pathog*. 11(10),  
1009 e1005195. Published online 2015/10/03 DOI: 10.1371/journal.ppat.1005195.
- 1010 Nealy, M.S., Coleman, C.B., Li, H., and Tibbetts, S.A. (2010). Use of a virus-encoded  
1011 enzymatic marker reveals that a stable fraction of memory B cells expresses latency-  
1012 associated nuclear antigen throughout chronic gammaherpesvirus infection. *J Virol*. 84(15),  
1013 7523-7534. Published online 2010/05/21 DOI: 10.1128/JVI.02572-09.
- 1014 Niemeyer, B.F., Oko, L.M., Medina, E.M., Oldenburg, D.G., White, D.W., Cool, C.D., Clambey,  
1015 E.T., and van Dyk, L.F. (2018). Host Tumor Suppressor p18(INK4c) Functions as a Potent  
1016 Cell-Intrinsic Inhibitor of Murine Gammaherpesvirus 68 Reactivation and Pathogenesis. *J Virol*.  
1017 92(6). Published online 2018/01/05 DOI: 10.1128/JVI.01604-17.
- 1018 O'Grady, T., Feswick, A., Hoffman, B.A., Wang, Y., Medina, E.M., Kara, M., van Dyk, L.F.,  
1019 Flemington, E.K., and Tibbetts, S.A. (2019). Genome-wide Transcript Structure Resolution  
1020 Reveals Abundant Alternate Isoform Usage from Murine Gammaherpesvirus 68. *Cell Rep*.  
1021 27(13), 3988-4002 e3985. Published online 2019/06/27 DOI: 10.1016/j.celrep.2019.05.086.
- 1022 Oko, L.M., Kimball, A.K., Kaspar, R.E., Knox, A.N., Coleman, C.B., Rochford, R., Chang, T.,  
1023 Alderete, B., van Dyk, L.F., and Clambey, E.T. (2019). Multidimensional analysis of  
1024 Gammaherpesvirus RNA expression reveals unexpected heterogeneity of gene expression.  
1025 *PLoS Pathog*. 15(6), e1007849. Published online 2019/06/06 DOI:  
1026 10.1371/journal.ppat.1007849.
- 1027 Pavlova, I., Lin, C.Y., and Speck, S.H. (2005). Murine gammaherpesvirus 68 Rta-dependent  
1028 activation of the gene 57 promoter. *Virology*. 333(1), 169-179. Published online 2005/02/15  
1029 DOI: 10.1016/j.virol.2004.12.021.

- 1030 Pellett, P.J., and Roizman, B. (2013). *Herpesviridae*. In: Fields Virology.
- 1031 Pfaffl, M.W. (2001). A new mathematical model for relative quantification in real-time RT-PCR.  
1032 Nucleic Acids Res. 29(9), e45. Published online 2001/05/09 DOI: 10.1093/nar/29.9.e45.
- 1033 Purushothaman, P., Thakker, S., and Verma, S.C. (2015). Transcriptome analysis of Kaposi's  
1034 sarcoma-associated herpesvirus during de novo primary infection of human B and endothelial  
1035 cells. J Virol. 89(6), 3093-3111. Published online 2015/01/02 DOI: 10.1128/JVI.02507-14.
- 1036 Rochford, R., Lutzke, M.L., Alfinito, R.S., Clavo, A., and Cardin, R.D. (2001). Kinetics of murine  
1037 gammaherpesvirus 68 gene expression following infection of murine cells in culture and in  
1038 mice. J Virol. 75(11), 4955-4963. Published online 2001/05/03 DOI: 10.1128/JVI.75.11.4955-  
1039 4963.2001.
- 1040 Ruiz, J.C., Hunter, O.V., and Conrad, N.K. (2019). Kaposi's sarcoma-associated herpesvirus  
1041 ORF57 protein protects viral transcripts from specific nuclear RNA decay pathways by  
1042 preventing hMTR4 recruitment. PLoS Pathog. 15(2), e1007596. Published online 2019/02/21  
1043 DOI: 10.1371/journal.ppat.1007596.
- 1044 Sen, N., Mukherjee, G., Sen, A., Bendall, S.C., Sung, P., Nolan, G.P., and Arvin, A.M. (2014).  
1045 Single-cell mass cytometry analysis of human tonsil T cell remodeling by varicella zoster virus.  
1046 Cell Rep. 8(2), 633-645. Published online 2014/07/22 DOI: 10.1016/j.celrep.2014.06.024.
- 1047 Shaffer, S.M., Dunagin, M.C., Torborg, S.R., Torre, E.A., Emert, B., Krepler, C., Beqiri, M.,  
1048 Sproesser, K., Brafford, P.A., Xiao, M., et al. (2017). Rare cell variability and drug-induced  
1049 reprogramming as a mode of cancer drug resistance. Nature. 546(7658), 431-435. Published  
1050 online 2017/06/14 DOI: 10.1038/nature22794.
- 1051 Shnayder, M., Nachshon, A., Krishna, B., Poole, E., Boshkov, A., Binyamin, A., Maza, I.,  
1052 Sinclair, J., Schwartz, M., and Stern-Ginossar, N. (2018). Defining the Transcriptional  
1053 Landscape during Cytomegalovirus Latency with Single-Cell RNA Sequencing. mBio. 9(2).  
1054 Published online 2018/03/15 DOI: 10.1128/mBio.00013-18.
- 1055 Smiley, J.R. (2004). Herpes simplex virus virion host shutoff protein: immune evasion  
1056 mediated by a viral RNase? J Virol. 78(3), 1063-1068. Published online 2004/01/15 DOI:  
1057 10.1128/jvi.78.3.1063-1068.2004.
- 1058 Suarez, A.L., and van Dyk, L.F. (2008). Endothelial cells support persistent gammaherpesvirus  
1059 68 infection. PLoS Pathog. 4(9), e1000152. Published online 2008/09/13 DOI:  
1060 10.1371/journal.ppat.1000152.
- 1061 Tarakanova, V.L., Leung-Pineda, V., Hwang, S., Yang, C.W., Matatall, K., Basson, M., Sun,  
1062 R., Piwnica-Worms, H., Sleckman, B.P., and Virgin, H.W.t. (2007). Gamma-herpesvirus kinase  
1063 actively initiates a DNA damage response by inducing phosphorylation of H2AX to foster viral  
1064 replication. Cell Host Microbe. 1(4), 275-286. Published online 2007/11/17 DOI:  
1065 10.1016/j.chom.2007.05.008.
- 1066 van Dyk, L.F., Virgin, H.W.t., and Speck, S.H. (2000). The murine gammaherpesvirus 68 v-  
1067 cyclin is a critical regulator of reactivation from latency. J Virol. 74(16), 7451-7461. Published  
1068 online 2000/07/25 DOI: 10.1128/jvi.74.16.7451-7461.2000.
- 1069 Van Skike, N.D., Minkah, N.K., Hogan, C.H., Wu, G., Benziger, P.T., Oldenburg, D.G., Kara,  
1070 M., Kim-Holzappel, D.M., White, D.W., Tibbetts, S.A., et al. (2018). Viral FGARAT ORF75A



- 1071 promotes early events in lytic infection and gammaherpesvirus pathogenesis in mice. PLoS  
1072 Pathog. 14(2), e1006843. Published online 2018/02/02 DOI: 10.1371/journal.ppat.1006843.
- 1073 Virgin, H.W.t., Latreille, P., Wamsley, P., Hallsworth, K., Weck, K.E., Dal Canto, A.J., and  
1074 Speck, S.H. (1997). Complete sequence and genomic analysis of murine gammaherpesvirus  
1075 68. J Virol. 71(8), 5894-5904. Published online 1997/08/01.
- 1076 Virgin, H.W.t., Presti, R.M., Li, X.Y., Liu, C., and Speck, S.H. (1999). Three distinct regions of  
1077 the murine gammaherpesvirus 68 genome are transcriptionally active in latently infected mice.  
1078 J Virol. 73(3), 2321-2332. Published online 1999/02/11.
- 1079 Waterboer, T., Rahaus, M., and Wolff, M.H. (2002). Varicella-zoster virus (VZV) mediates a  
1080 delayed host shutoff independent of open reading frame (ORF) 17 expression. Virus Genes.  
1081 24(1), 49-56. Published online 2002/04/04 DOI: 10.1023/a:1014086004141.
- 1082 Weitzman, M.D., and Fradet-Turcotte, A. (2018). Virus DNA Replication and the Host DNA  
1083 Damage Response. Annu Rev Virol. 5(1), 141-164. Published online 2018/07/12 DOI:  
1084 10.1146/annurev-virology-092917-043534.
- 1085 Wu, T.T., Usherwood, E.J., Stewart, J.P., Nash, A.A., and Sun, R. (2000). Rta of murine  
1086 gammaherpesvirus 68 reactivates the complete lytic cycle from latency. J Virol. 74(8), 3659-  
1087 3667. Published online 2000/03/23 DOI: 10.1128/jvi.74.8.3659-3667.2000.
- 1088 Wyler, E., Franke, V., Menegatti, J., Kocks, C., Boltengagen, A., Praktijnjo, S., Walch-  
1089 Ruckheim, B., Bosse, J., Rajewsky, N., Grasser, F., et al. (2019). Single-cell RNA-sequencing  
1090 of herpes simplex virus 1-infected cells connects NRF2 activation to an antiviral program. Nat  
1091 Commun. 10(1), 4878. Published online 2019/10/28 DOI: 10.1038/s41467-019-12894-z.
- 1092 Zamora, M.R. (2011). DNA viruses (CMV, EBV, and the herpesviruses). Semin Respir Crit  
1093 Care Med. 32(4), 454-470. Published online 2011/08/23 DOI: 10.1055/s-0031-1283285.
- 1094 Zhang, K., Lv, D.W., and Li, R. (2019). Conserved Herpesvirus Protein Kinases Target  
1095 SAMHD1 to Facilitate Virus Replication. Cell Rep. 28(2), 449-459 e445. Published online  
1096 2019/07/11 DOI: 10.1016/j.celrep.2019.04.020.
- 1097

A.

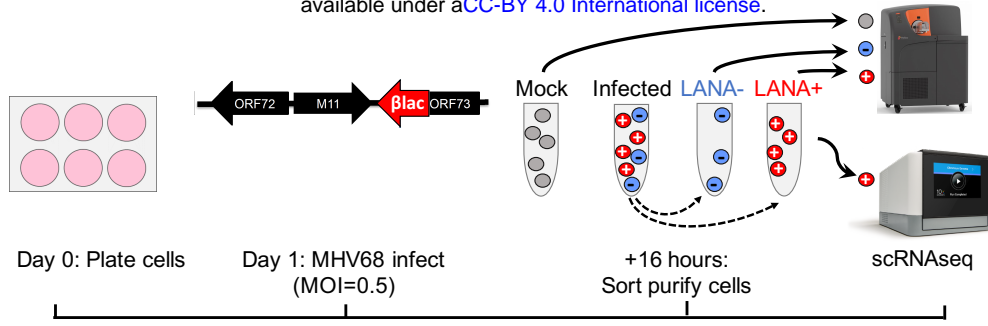

B.

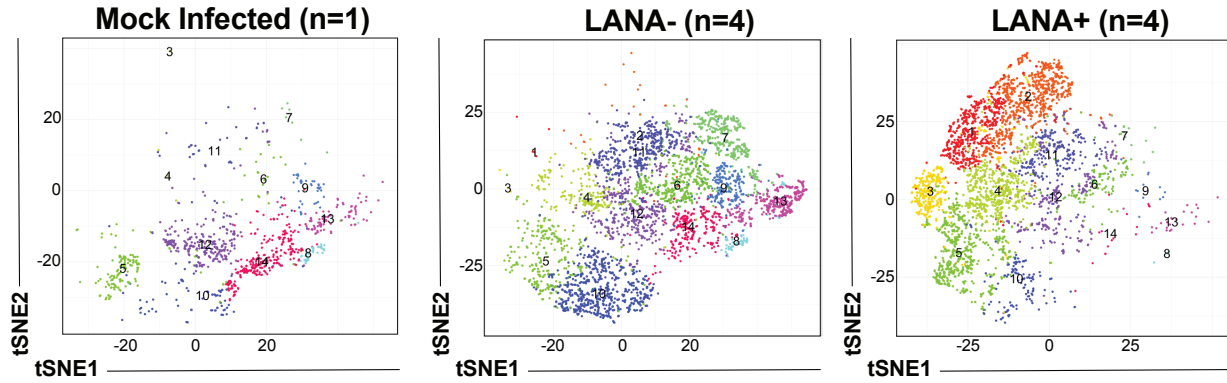

C.

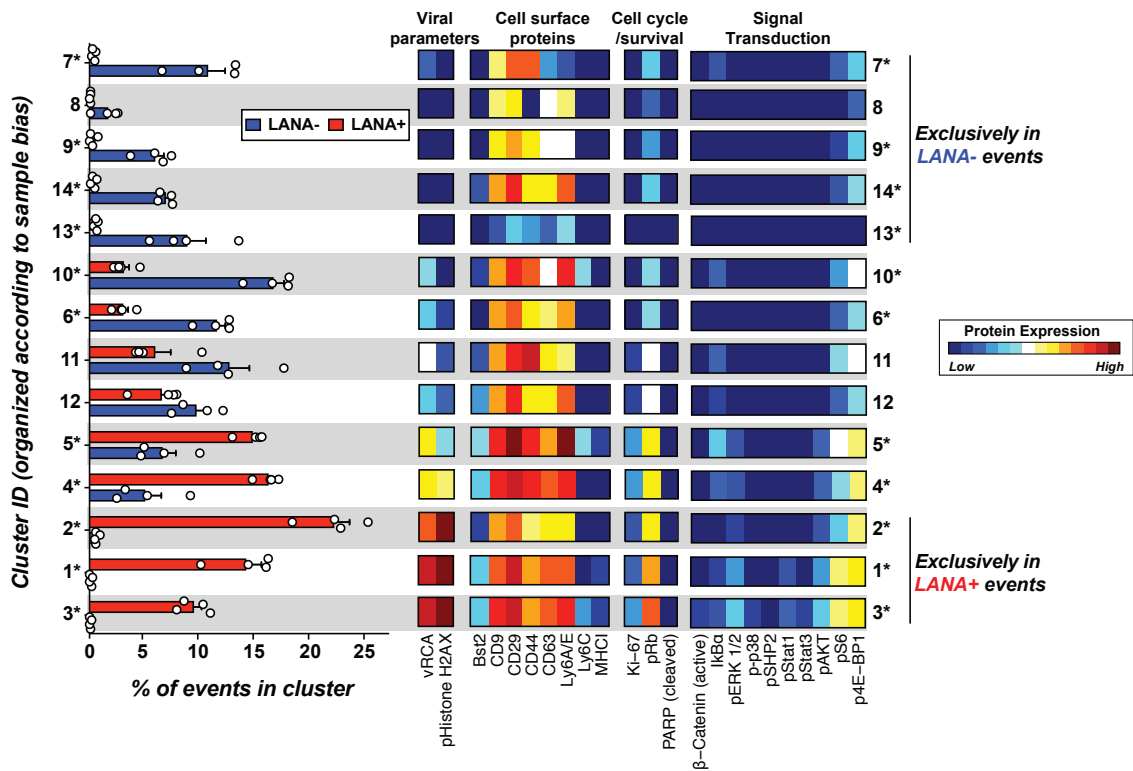

D.

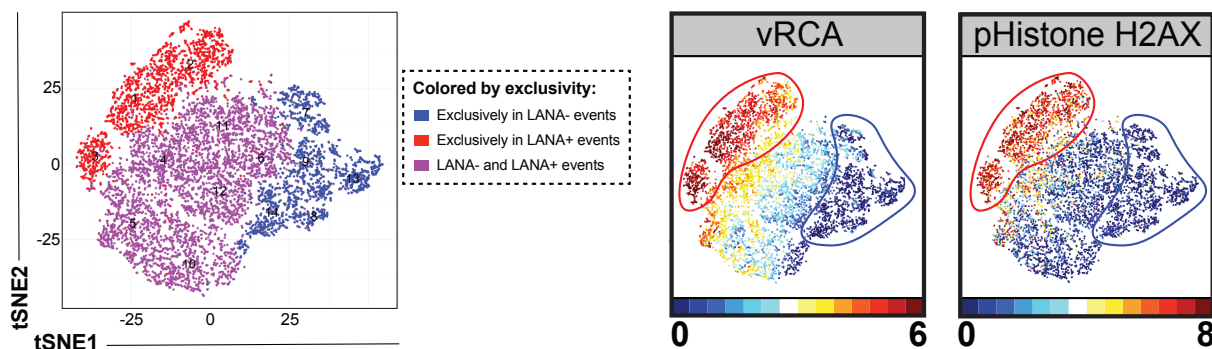

Figure 1  
Berger et al

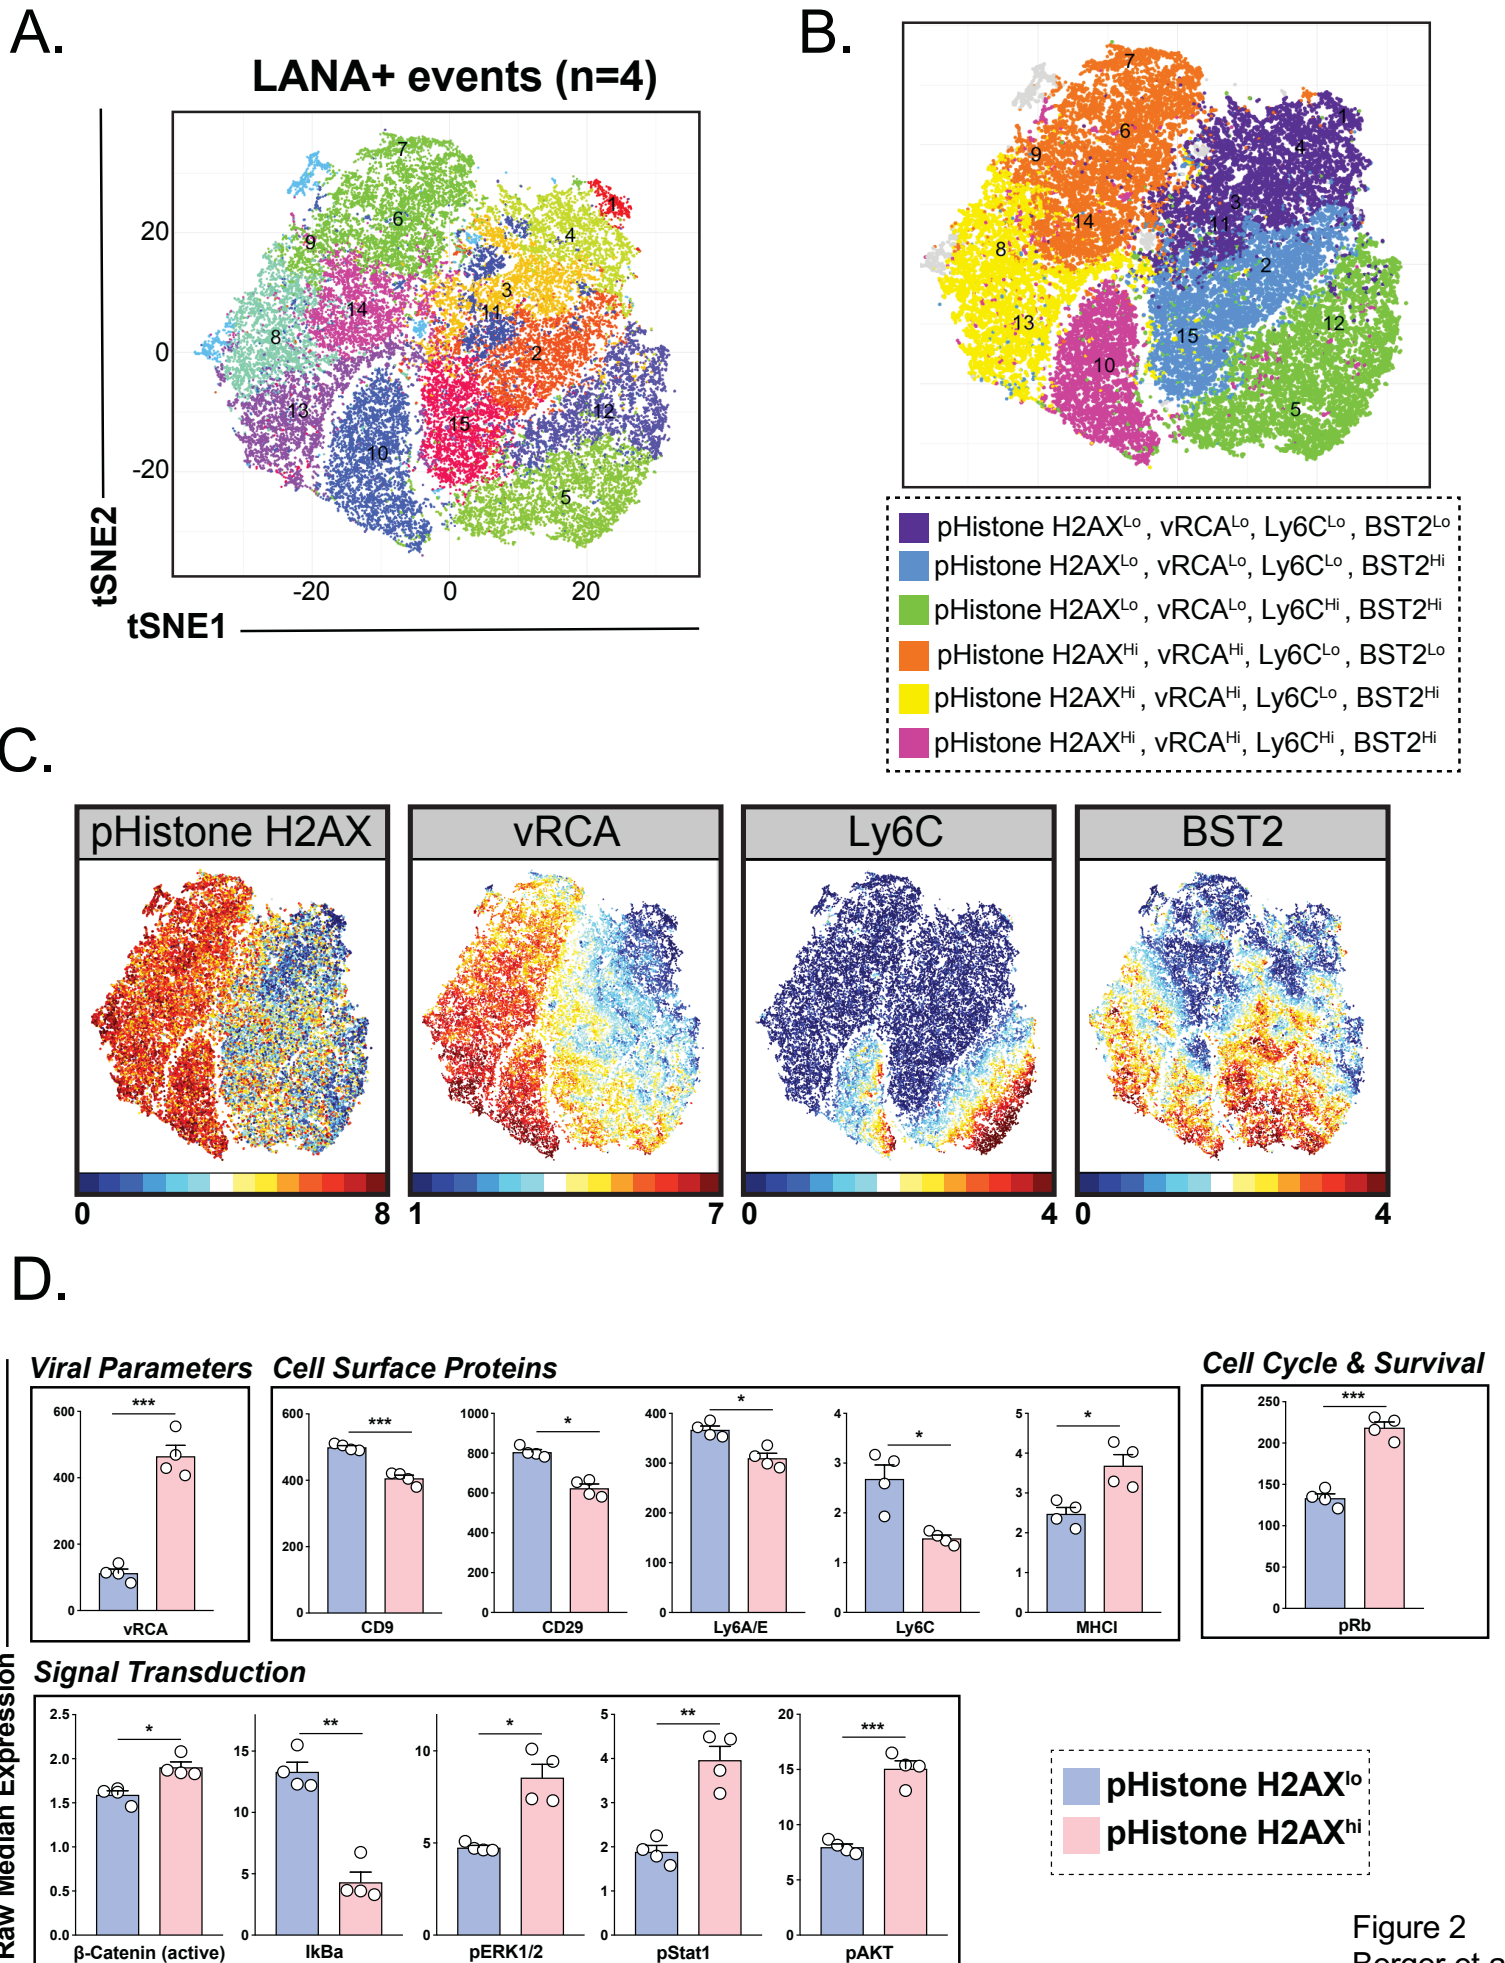

Figure 2  
Berger et al

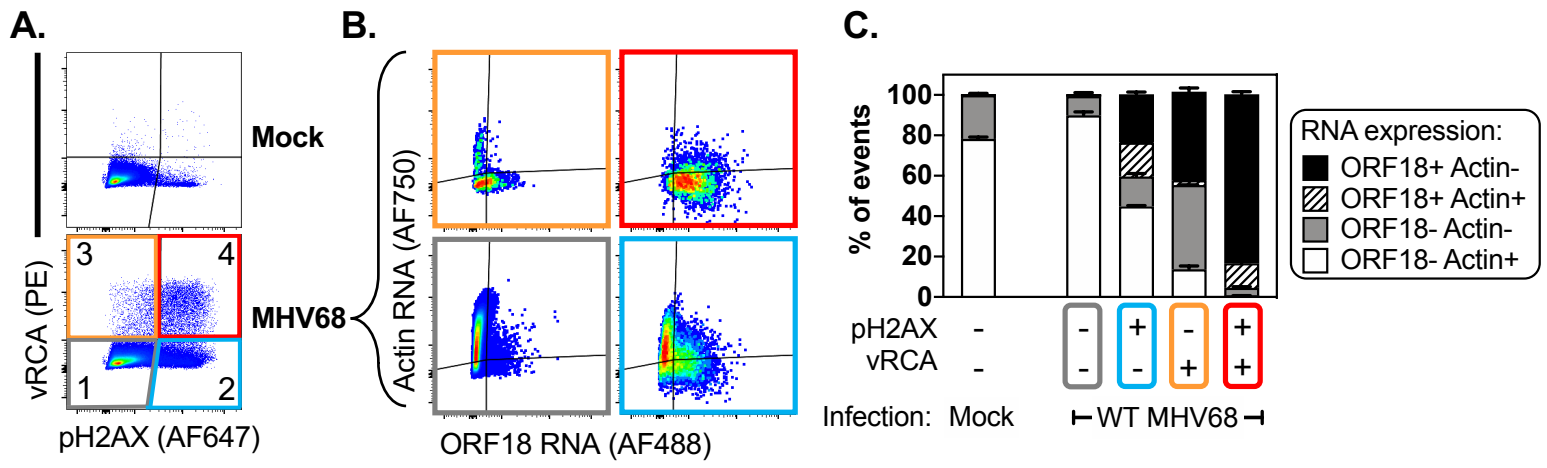

Figure 3  
Berger et al

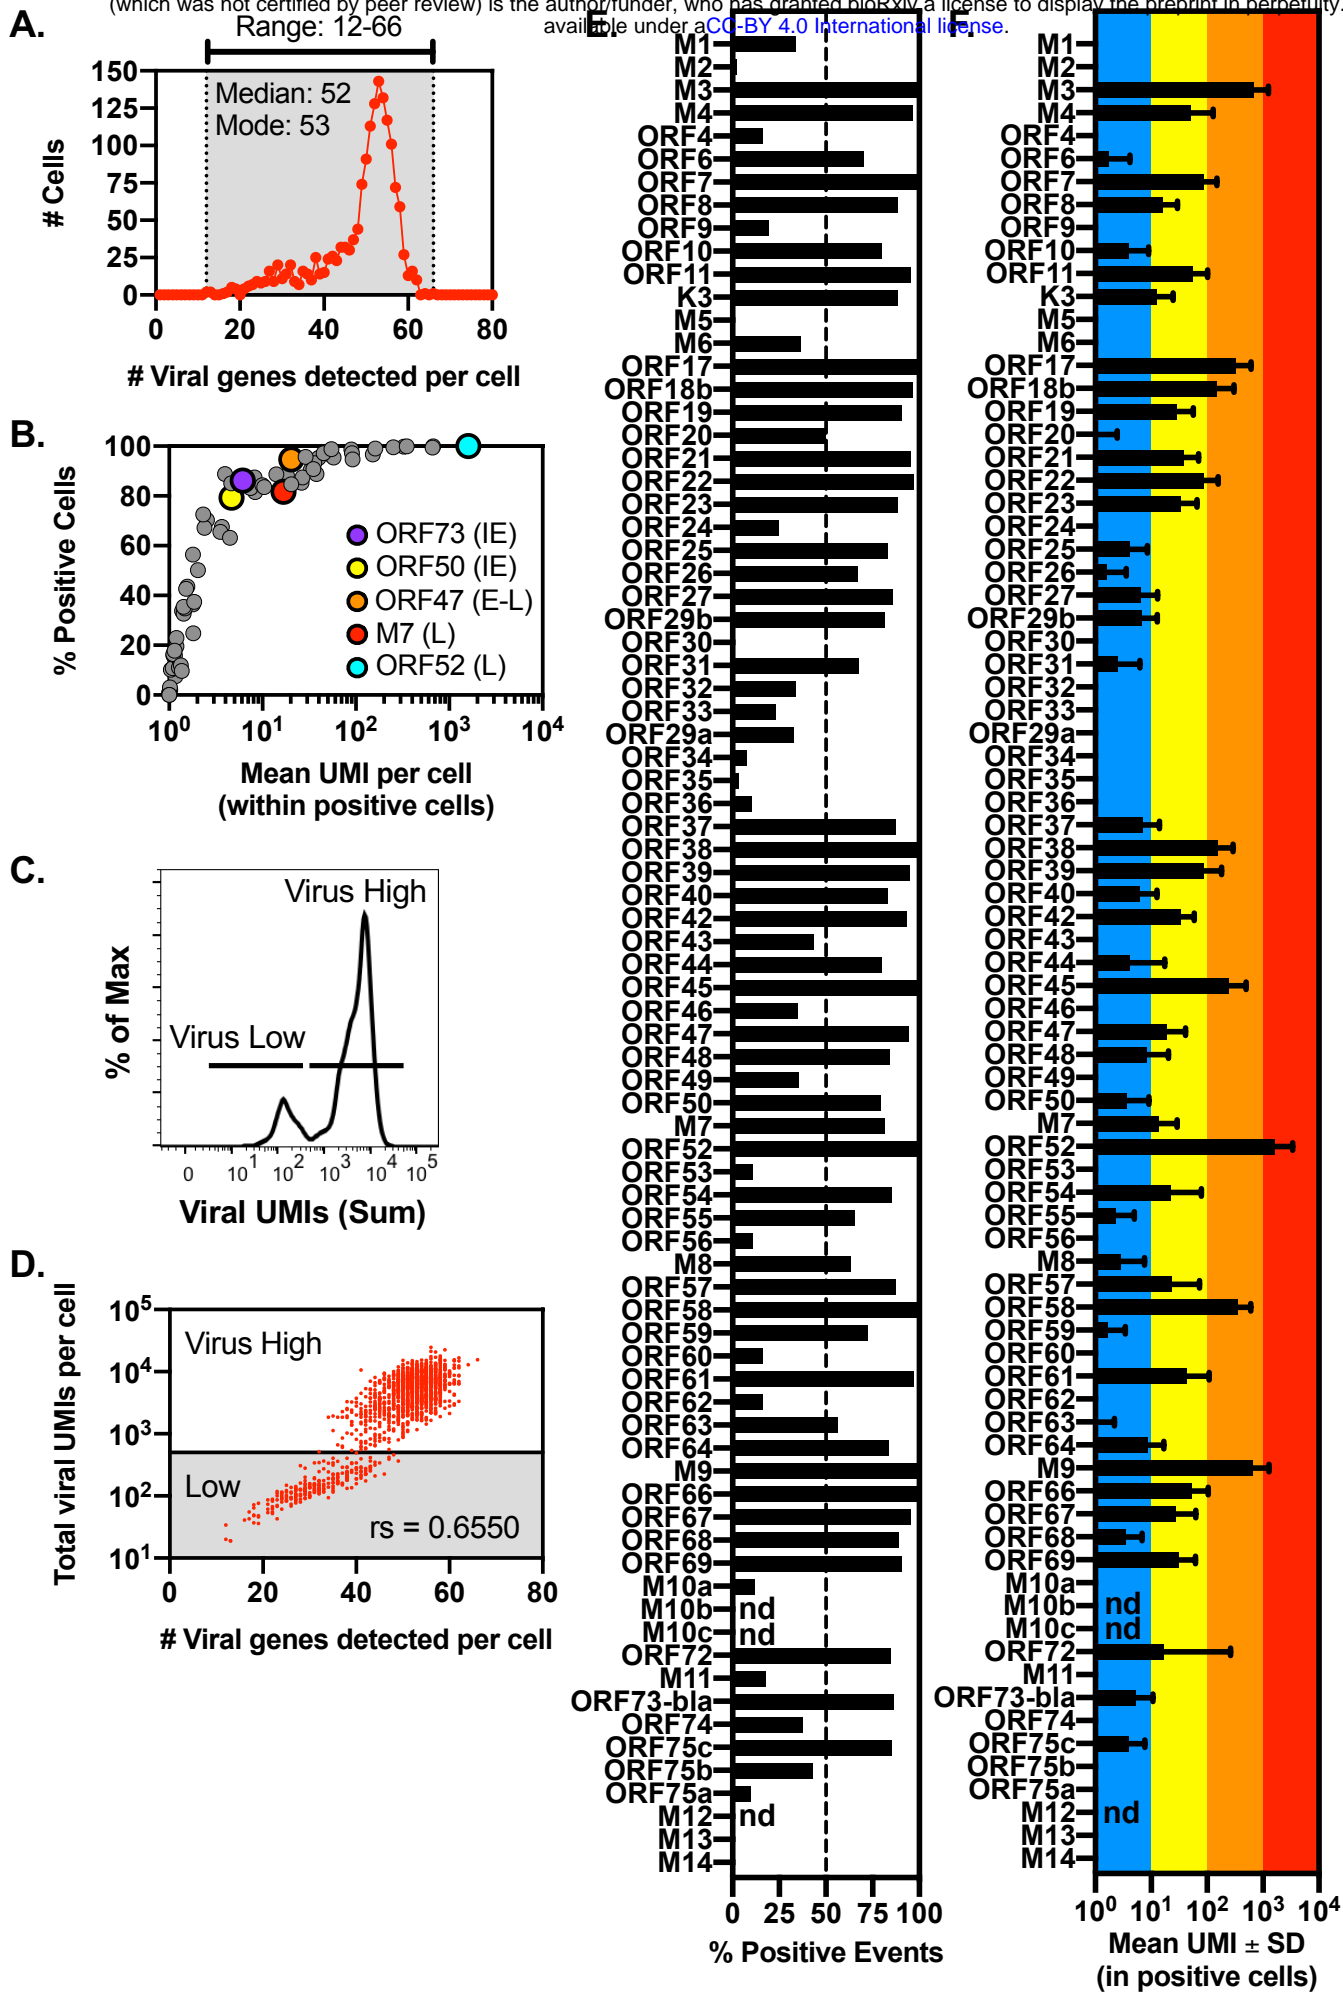

Figure 4  
Berger et al

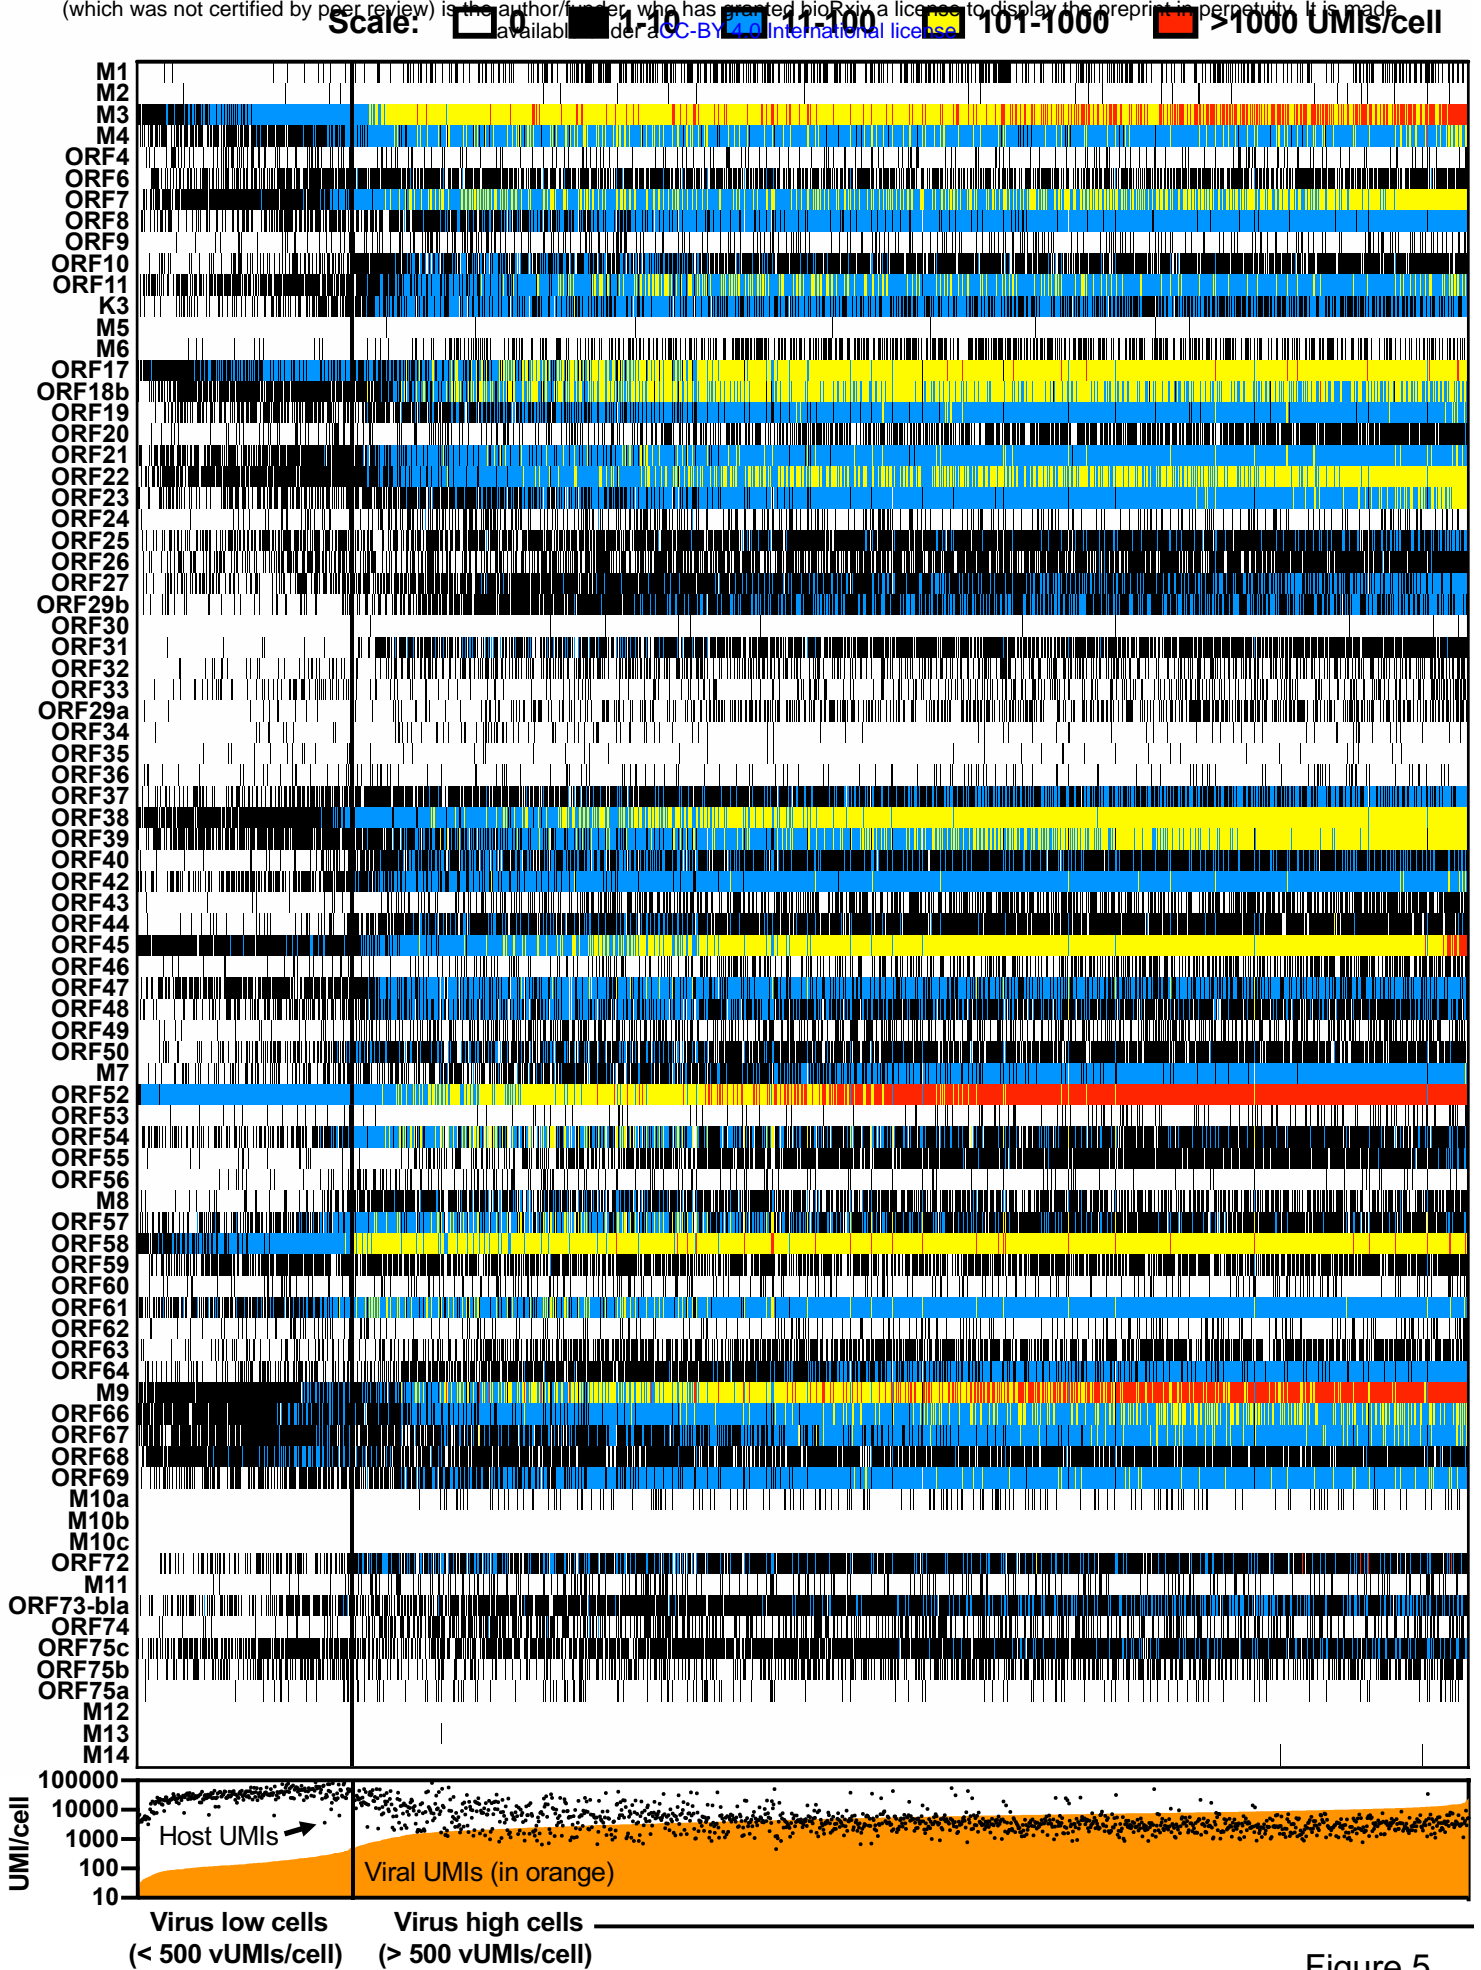

Figure 5  
Berger et al

**A. K-means clustering**

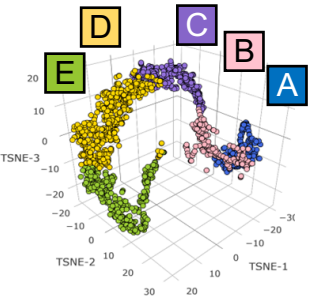

**B.**

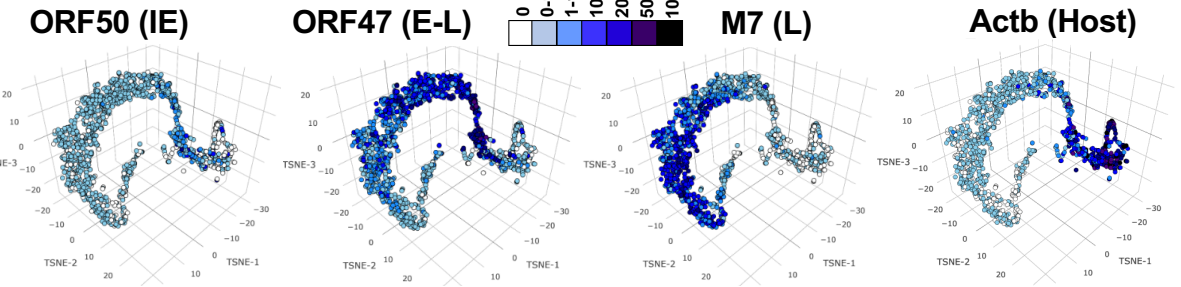

**C. ActB:ORF37 Ratio**

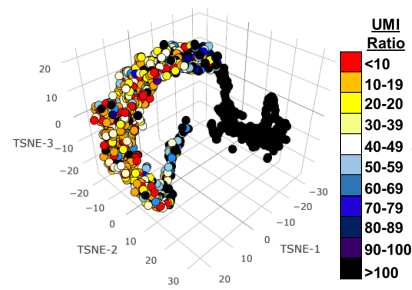

**D. % Viral UMIs**

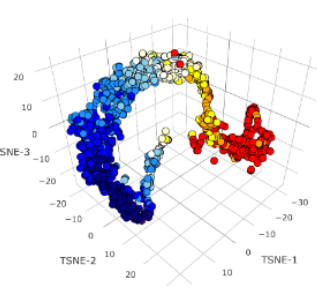

**% Host UMIs**

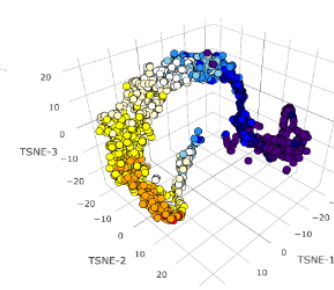

**E.**

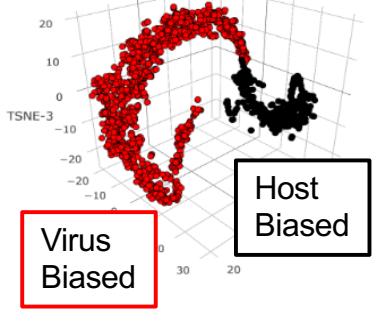

**F.**

| Cell Groups  | Cell # | Total UMIs | Viral UMIs | Host UMIs  | UMI Ratio (Virus:Host) | % Viral UMIs | % Host UMIs |
|--------------|--------|------------|------------|------------|------------------------|--------------|-------------|
| Virus Biased | 1176   | 12,214,549 | 7,614,463  | 4,600,086  | 1.655                  | 62.339       | 37.661      |
| Host Biased  | 429    | 13,048,564 | 506,293    | 12,542,271 | 0.04                   | 3.880        | 96.120      |

**G.**

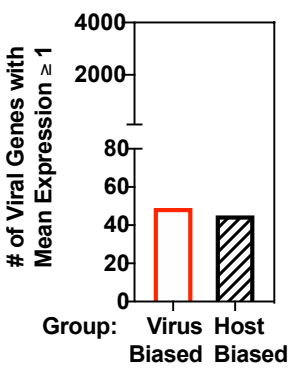

**H.**

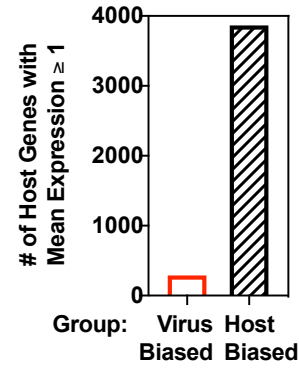

**I.**

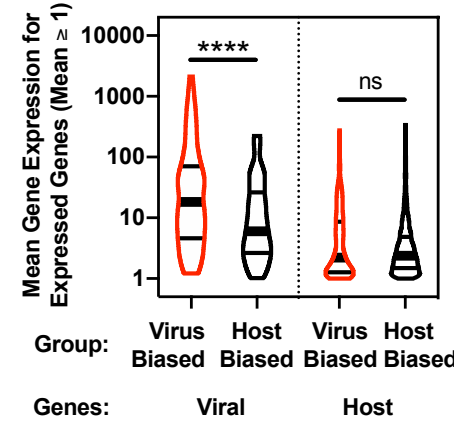

**J.**

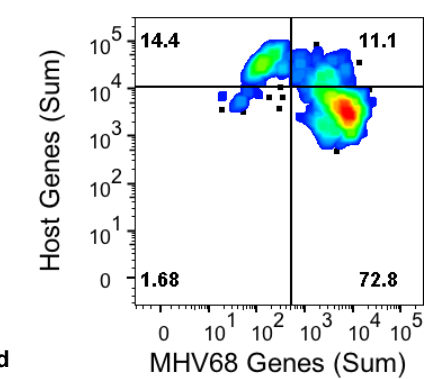

**K.**

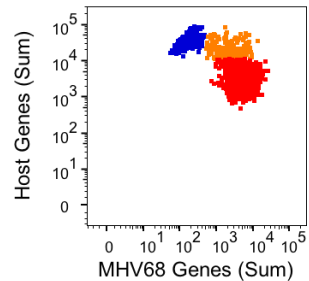

**L.**

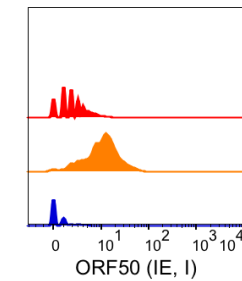

**M.**

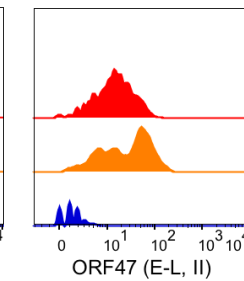

**N.**

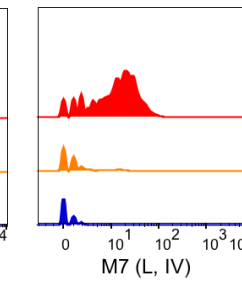

**O.**

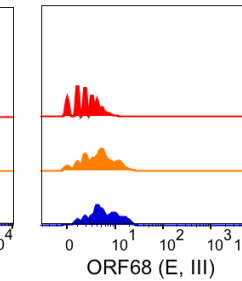

**P.**

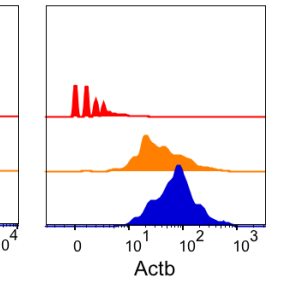

Virus<sup>low</sup> Host<sup>high</sup>

Virus<sup>high</sup> Host<sup>high</sup>

Virus<sup>high</sup> Host<sup>low</sup>

Figure 6  
Berger et al

A.

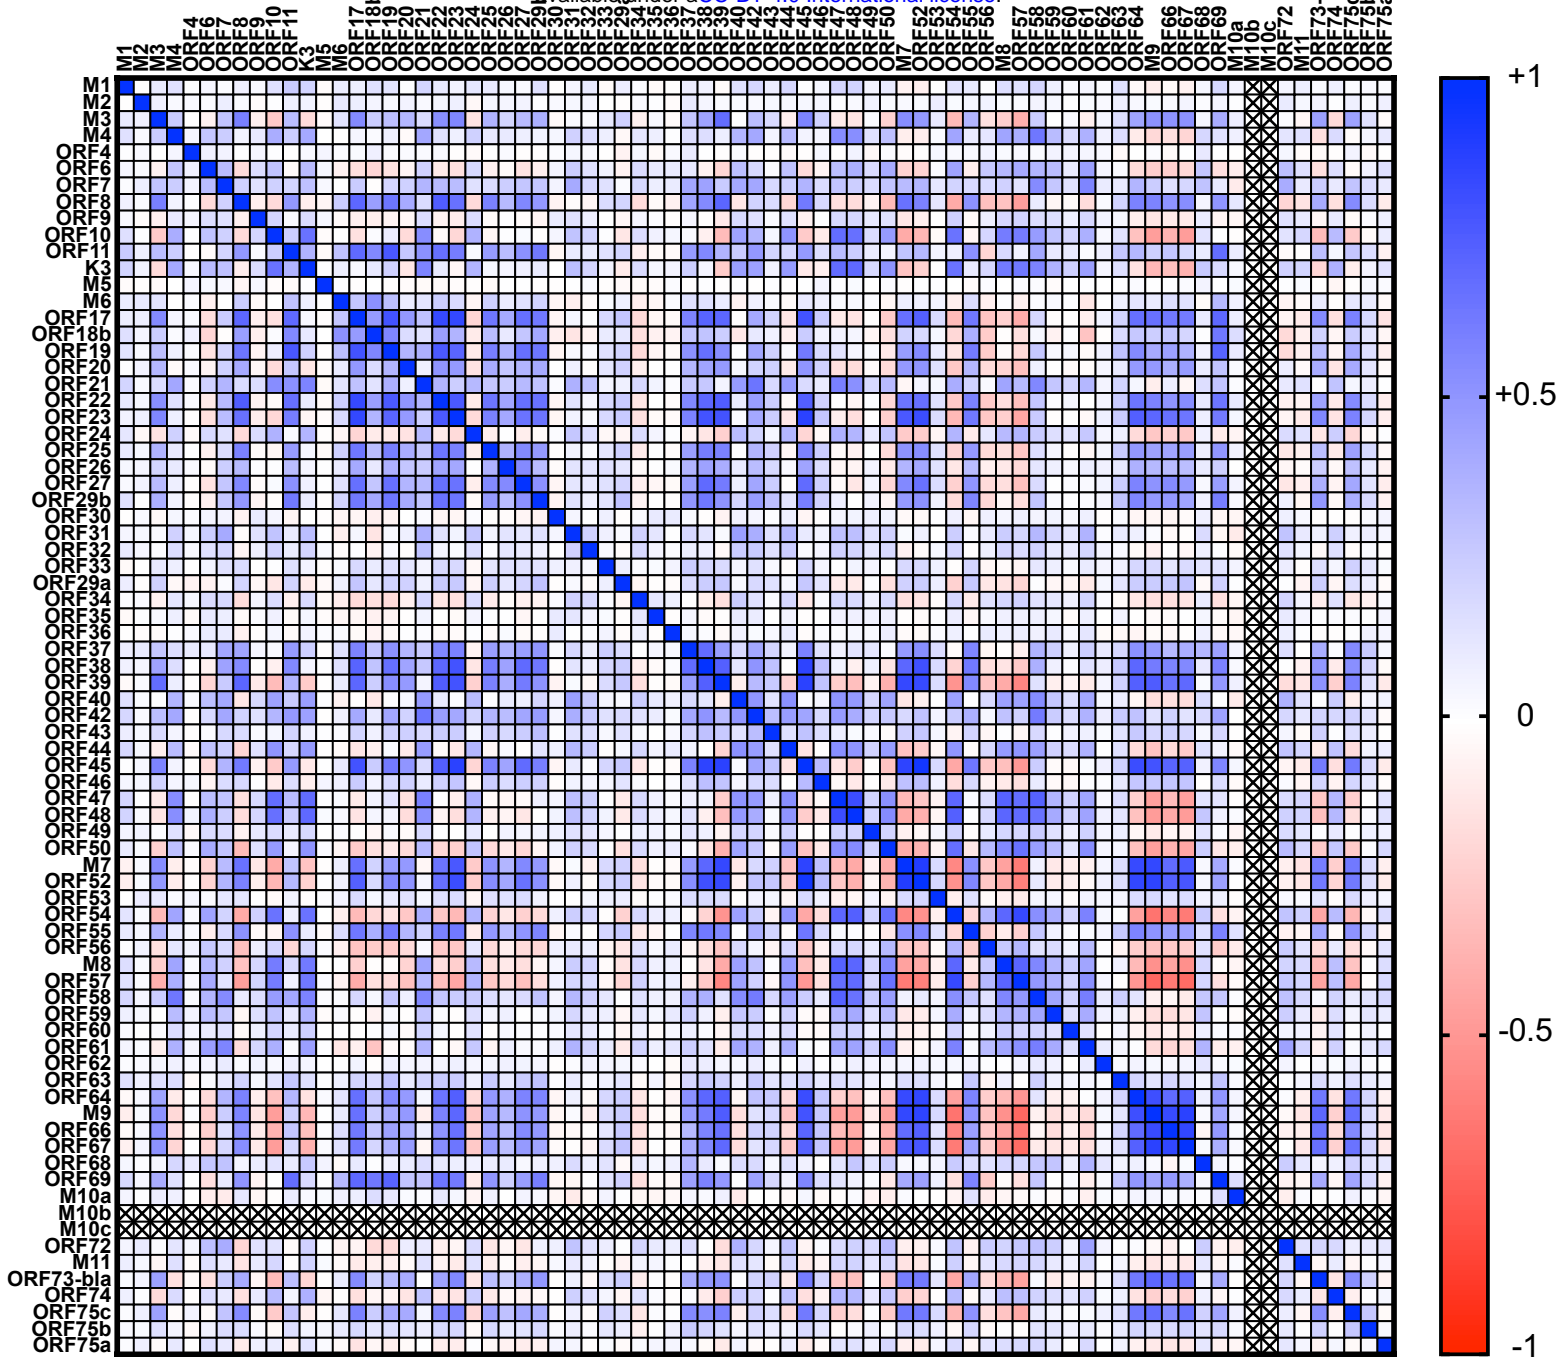

B.

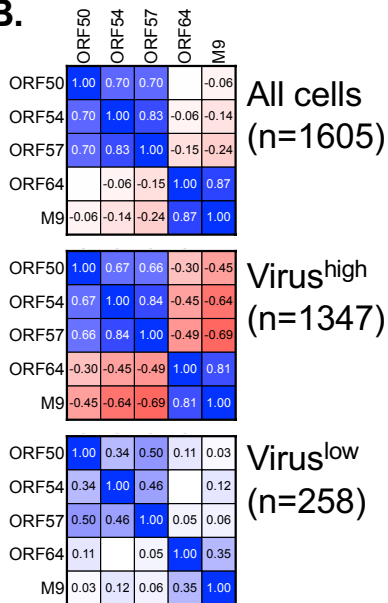

C.

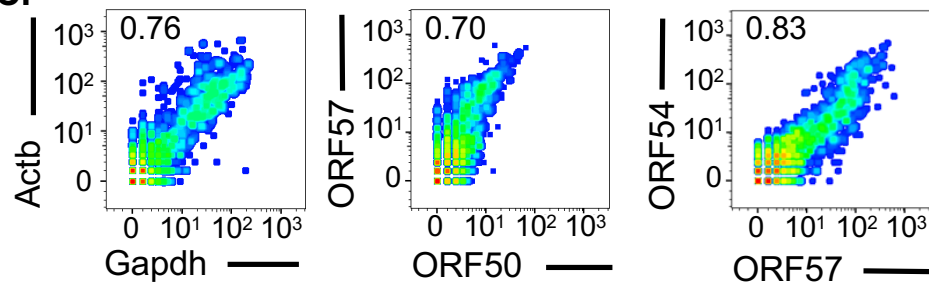

D.

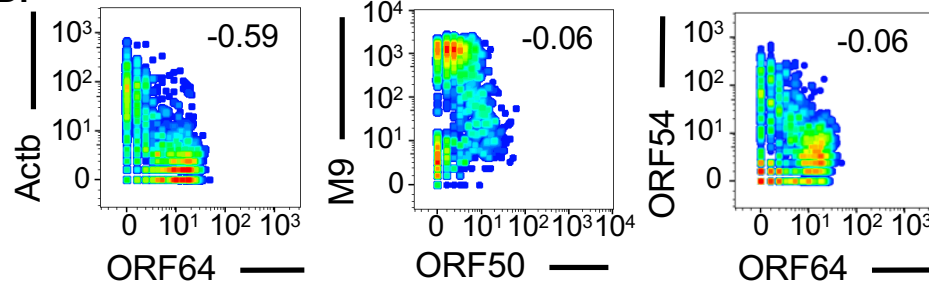

Source: https://www.biorxiv.org/content/10.1101/2020.08.11.203117v1.full.pdf
